# Supplementary material for: Genetic liability to mental disorders in relation to the risk of hypertension
Source: Front Cardiovasc Med. 2023 Feb 27;10:1087251. doi: 10.3389/fcvm.2023.1087251 (PMC10008891; doi:10.3389/fcvm.2023.1087251)
Supplement: Supplementary file 1 [file Table_1.XLSX]

## Sheet: ADHD
Phenotype	SNP	effect_allele	other_allele	beta	se	pval
ADHD	rs11420276	G	GT	0.107203	0.0146	2.143e-13
ADHD	rs1222063	A	G	0.0962007	0.0174	3.068e-08
ADHD	rs9677504	A	G	0.116903	0.0206	1.391e-08
ADHD	rs4858241	T	G	0.0789036	0.014	1.74e-08
ADHD	rs28411770	T	C	0.0861043	0.0151	1.152e-08
ADHD	rs4916723	A	C	-0.0766003	0.0135	1.576e-08
ADHD	rs5886709	G	GTC	0.075803	0.0134	1.658e-08
ADHD	rs74760947	A	G	-0.179797	0.0317	1.348e-08
ADHD	rs11591402	A	T	-0.0929051	0.0164	1.336e-08
ADHD	rs1427829	A	G	0.0799012	0.0133	1.822e-09
ADHD	rs281324	T	C	-0.0744973	0.0134	2.678e-08
ADHD	rs212178	A	G	-0.1154	0.02	7.677e-09

## Sheet: FinnGen
Phenotype	SNP	effect_allele	other_allele	beta	se	pval
FinnGen	rs9677504	A	G	0.0116	0.0158	0.4641
FinnGen	rs4858241	G	T	-0.005	0.0105	0.632
FinnGen	rs4916723	C	A	-0.0136	0.0098	0.1678
FinnGen	rs5886709	G	C	-0.0067	0.01	0.4989
FinnGen	rs74760947	G	A	0.0125	0.0194	0.5189
FinnGen	rs11591402	A	T	-0.001	0.0113	0.9317
FinnGen	rs1427829	G	A	0.0187	0.0101	0.06375
FinnGen	rs281324	C	T	0.0058	0.0099	0.5619
FinnGen	rs212178	A	G	-0.0078	0.0201	0.6993

## Sheet: UK Biobank ICD 10
Phenotype	SNP	effect_allele	other_allele	beta	se	pval
ICD 10	rs9677504	A	G	0.0163533	0.0110623	0.14
ICD 10	rs4858241	G	T	-0.0244961	0.0066624	0.000239999
ICD 10	rs4916723	C	A	-0.0069003	0.00657694	0.29
ICD 10	rs74760947	G	A	-0.00871679	0.0152342	0.57
ICD 10	rs11591402	A	T	-0.0093459	0.0079033	0.24
ICD 10	rs1427829	G	A	-0.0113891	0.00644903	0.0769999
ICD 10	rs281324	C	T	0.00361031	0.00632757	0.57
ICD 10	rs212178	A	G	-0.0144256	0.0102376	0.16

## Sheet: UK Bioabnk Self-reported 
Phenotype	SNP	effect_allele	other_allele	beta	se	pval
Self-reported	rs9677504	A	G	0.00806209	0.00663801	0.22
Self-reported	rs4858241	G	T	-0.00606916	0.0039997	0.13
Self-reported	rs4916723	C	A	-0.0062524	0.00394841	0.11
Self-reported	rs74760947	G	A	0.000718659	0.00914774	0.94
Self-reported	rs11591402	A	T	0.00207401	0.00474485	0.66
Self-reported	rs1427829	G	A	0.00727144	0.00387143	0.0599998
Self-reported	rs281324	C	T	0.00444267	0.00380128	0.24
Self-reported	rs212178	A	G	-0.00874471	0.00614958	0.16
