# Supplementary material for: Genetic liability to mental disorders in relation to the risk of hypertension
Source: Front Cardiovasc Med. 2023 Feb 27;10:1087251. doi: 10.3389/fcvm.2023.1087251 (PMC10008891; doi:10.3389/fcvm.2023.1087251)
Supplement: Supplementary file 2 [file Table_2.XLSX]

## Sheet: Anxiety disorder
Phenotype	SNP	effect_allele	other_allele	beta	se	pval
anxiety	rs4855559	T	G	-0.12	0.0217999	3.7e-08
anxiety	rs2861139	C	T	0.13	0.0218302	2.6e-09
anxiety	rs3807866	A	G	0.12	0.0219838	4.8e-08
anxiety	rs10959883	C	T	-0.15	0.0225511	2.9e-11
anxiety	rs1187280	G	A	0.13	0.0224107	6.6e-09

## Sheet: FinnGen
Phenotype	SNP	effect_allele	other_allele	beta	se	pval
FinnGen	rs4855559	T	G	0.0171	0.0119	0.1517
FinnGen	rs2861139	C	T	-0.0161	0.0101	0.1085
FinnGen	rs3807866	A	G	0.0358	0.0102	0.0004483
FinnGen	rs10959883	C	T	0.0012	0.0132	0.927
FinnGen	rs1187280	G	A	0.0024	0.013	0.8526

## Sheet: UK Biobank ICD 10
Phenotype	SNP	effect_allele	other_allele	beta	se	pval
ICD 10	rs4855559	T	G	-4.07047e-05	0.00713929	1
ICD 10	rs2861139	C	T	-0.00674258	0.00648669	0.3
ICD 10	rs3807866	A	G	0.0190712	0.00652176	0.00350002
ICD 10	rs10959883	C	T	-0.0238967	0.00787615	0.00239999
ICD 10	rs1187280	G	A	-0.00182773	0.00793501	0.82

## Sheet: UK Bioabnk Self-reported 
Phenotype	SNP	effect_allele	other_allele	beta	se	pval
Self-reported	rs4855559	T	G	-0.00621185	0.00428591	0.15
Self-reported	rs2861139	C	T	-0.00986412	0.00389422	0.0109999
Self-reported	rs3807866	A	G	0.00805701	0.0039155	0.04
Self-reported	rs10959883	C	T	-0.0122444	0.0047304	0.00959997
Self-reported	rs1187280	G	A	-0.00239584	0.00476562	0.62
