# Supplementary material for: Genetic liability to mental disorders in relation to the risk of hypertension
Source: Front Cardiovasc Med. 2023 Feb 27;10:1087251. doi: 10.3389/fcvm.2023.1087251 (PMC10008891; doi:10.3389/fcvm.2023.1087251)
Supplement: Supplementary file 3 [file Table_3.XLSX]

## Sheet: Autism spectrum disorder
Phenotype	SNP	effect_allele	other_allele	beta	se	pval
ASD	rs10099100	C	G	0.0843044	0.0147	1.065e-08
ASD	rs910805	A	G	-0.0956963	0.016	2.041e-09
ASD	rs71190156	GTTTTTTT	G	-0.0781021	0.014	2.752e-08

## Sheet: FinnGen
Phenotype	SNP	effect_allele	other_allele	beta	se	pval
FinnGen	rs10099100	C	G	-0.006	0.0132	0.6467
FinnGen	rs910805	A	G	-0.03	0.0114	0.0085

## Sheet: UK Biobank ICD 10
Phenotype	SNP	effect_allele	other_allele	beta	se	pval
ICD 10	rs10099100	C	G	-0.00201626	0.000704941	0.00420001
ICD 10	rs910805	A	G	-0.00156222	0.000781593	0.0460002

## Sheet: UK Bioabnk Self-reported 
Phenotype	SNP	effect_allele	other_allele	beta	se	pval
Self-reported	rs10099100	C	G	-0.00386084	0.000950031	4.79999e-05
Self-reported	rs910805	A	G	-0.00345861	0.00105379	0.001
