# Supplementary material for: Genetic liability to mental disorders in relation to the risk of hypertension
Source: Front Cardiovasc Med. 2023 Feb 27;10:1087251. doi: 10.3389/fcvm.2023.1087251 (PMC10008891; doi:10.3389/fcvm.2023.1087251)
Supplement: Supplementary file 4 [file Table_4.XLSX]

## Sheet: Depression
Phenotype	SNP	effect_allele	other_allele	beta	se	pval
depression	rs301799	T	C	-0.025	0.0035	1.356e-12
depression	rs1002656	T	C	-0.0266	0.0038	3.739e-12
depression	rs1466887	T	C	-0.0199	0.0036	4.118e-08
depression	rs11579246	A	G	0.0381	0.0061	5.706e-10
depression	rs1890946	T	C	-0.0235	0.0035	2.68e-11
depression	rs10789214	T	C	0.0193	0.0035	4.442e-08
depression	rs2568958	A	G	0.0373	0.0036	8.473e-25
depression	rs10890020	A	G	-0.0277	0.0035	4.028e-15
depression	rs113188507	A	G	0.0221	0.0039	1.871e-08
depression	rs10913112	T	C	-0.0264	0.0036	3.4e-13
depression	rs72710803	A	C	-0.041	0.0062	5.289e-11
depression	rs169235	A	G	-0.0229	0.0041	2.976e-08
depression	rs17641524	T	C	-0.032	0.0043	1.522e-13
depression	rs12052908	A	T	-0.022	0.0035	4.436e-10
depression	rs1568452	T	C	0.0248	0.0036	8.118e-12
depression	rs7585722	T	C	-0.0269	0.0048	2.675e-08
depression	rs1226412	T	C	0.0256	0.0043	3.459e-09
depression	rs62188629	A	G	0.0236	0.0038	7.127e-10
depression	rs4346585	T	C	-0.0236	0.0038	7.127e-10
depression	rs13084037	A	G	-0.0245	0.0042	7.084e-09
depression	rs7624336	T	G	0.0238	0.0043	3.957e-08
depression	rs141954845	A	G	0.0229	0.0037	8.145e-10
depression	rs6783233	T	C	0.0218	0.0039	2.903e-08
depression	rs1095626	T	C	-0.0264	0.0035	7.131e-14
depression	rs7685686	A	G	0.0202	0.0036	2.571e-08
depression	rs34937911	T	C	0.0304	0.0055	4.13e-08
depression	rs45510091	A	G	0.0448	0.008	1.826e-08
depression	rs35553410	T	C	-0.0244	0.004	1.417e-09
depression	rs7659414	A	C	-0.0201	0.0035	1.204e-08
depression	rs60157091	T	C	0.02	0.0035	1.421e-08
depression	rs3099439	T	C	-0.0276	0.0035	5.049e-15
depression	rs10061069	C	G	-0.0275	0.0042	8.152e-11
depression	rs30266	A	G	0.0308	0.0037	1.445e-16
depression	rs11135349	A	C	-0.0295	0.0035	6.042e-17
depression	rs200949	A	G	0.048	0.0053	2.525e-19
depression	rs9363467	T	C	0.0237	0.0036	6.437e-11
depression	rs7758630	A	T	-0.0225	0.0036	5.56e-10
depression	rs1933802	C	G	-0.0223	0.0035	2.567e-10
depression	rs2876520	C	G	-0.023	0.0036	2.294e-10
depression	rs725616	T	C	0.0204	0.0036	1.871e-08
depression	rs2029865	A	T	-0.0201	0.0035	1.204e-08
depression	rs3823624	T	C	0.0272	0.0045	1.992e-09
depression	rs2043539	A	G	0.0273	0.0035	9.893e-15
depression	rs2247523	C	G	-0.0207	0.0035	4.377e-09
depression	rs16887442	T	C	0.0203	0.0035	8.621e-09
depression	rs58104186	A	G	0.0237	0.0035	1.819e-11
depression	rs7807677	T	C	0.0237	0.0035	1.819e-11
depression	rs7837935	T	G	-0.0292	0.0049	3.343e-09
depression	rs67436663	C	G	-0.0259	0.0042	9.374e-10
depression	rs1354115	A	C	0.021	0.0036	7.084e-09
depression	rs1982277	T	C	0.0279	0.0041	1.447e-11
depression	rs263645	A	T	0.0221	0.0035	3.699e-10
depression	rs3793577	A	G	-0.0229	0.0035	8.411e-11
depression	rs59283172	A	G	-0.0329	0.0057	1.016e-08
depression	rs34653192	C	G	-0.0229	0.0038	2.225e-09
depression	rs7030813	T	C	0.0253	0.0036	3.074e-12
depression	rs10817969	T	G	0.0261	0.0039	3.108e-11
depression	rs913930	A	G	-0.0208	0.0037	2.421e-08
depression	rs2670139	T	C	-0.0266	0.0041	1.207e-10
depression	rs997934	T	C	0.0198	0.0036	4.812e-08
depression	rs1021363	A	G	0.0303	0.0037	4.406e-16
depression	rs1448938	A	G	0.0214	0.0035	1.297e-09
depression	rs2509805	T	C	0.022	0.0038	9.17e-09
depression	rs198457	T	C	-0.0292	0.0046	2.986e-10
depression	rs58621819	A	T	-0.0245	0.0043	1.565e-08
depression	rs7117514	A	G	-0.0204	0.0035	7.286e-09
depression	rs7932640	T	C	0.0281	0.0035	1.62e-15
depression	rs61902811	A	G	-0.0257	0.0036	1.395e-12
depression	rs2187490	T	G	-0.0338	0.0061	3.824e-08
depression	rs57344483	A	G	-0.038	0.0068	1.818e-08
depression	rs78337797	T	G	0.0306	0.0055	3.365e-08
depression	rs56314503	T	G	-0.0254	0.004	2.945e-10
depression	rs10774600	T	C	-0.0267	0.0048	3.387e-08
depression	rs3213572	A	G	0.0217	0.0035	7.612e-10
depression	rs1409379	T	C	0.0249	0.0041	1.671e-09
depression	rs1343605	A	C	0.0313	0.0036	6.229e-18
depression	rs9592461	A	G	0.0216	0.0035	9.1e-10
depression	rs9545360	A	C	-0.0271	0.0046	5.021e-09
depression	rs4772087	T	C	0.0227	0.0036	3.911e-10
depression	rs61990288	A	G	-0.026	0.0035	1.681e-13
depression	rs1956373	T	G	-0.0226	0.004	2.059e-08
depression	rs1152578	T	C	-0.0218	0.0035	6.363e-10
depression	rs1045430	T	G	-0.0253	0.0035	7.308e-13
depression	rs10149470	A	G	-0.0267	0.0035	3.718e-14
depression	rs8037355	T	C	-0.0233	0.0035	3.936e-11
depression	rs34488670	T	C	-0.0252	0.0043	6.033e-09
depression	rs7193263	A	G	-0.0239	0.0038	4.331e-10
depression	rs7198928	T	C	0.0239	0.0036	4.447e-11
depression	rs7200826	T	C	0.028	0.004	3.739e-12
depression	rs56887639	A	G	-0.0278	0.0039	1.506e-12
depression	rs12923444	A	C	-0.0214	0.0035	1.297e-09
depression	rs75581564	A	G	0.0301	0.0054	3.172e-08
depression	rs12967855	A	G	0.0265	0.0037	1.18e-12
depression	rs7227069	A	G	0.0238	0.0035	1.497e-11
depression	rs62091461	T	C	-0.0254	0.0042	1.954e-09
depression	rs12966052	C	G	-0.0314	0.0046	1.252e-11
depression	rs12967143	C	G	-0.0312	0.0038	3.699e-16
depression	rs7241572	A	G	0.028	0.0044	2.698e-10
depression	rs33431	T	C	0.0198	0.0036	4.812e-08
depression	rs143186028	T	G	0.0277	0.0046	2.288e-09
depression	rs12624433	A	G	0.0233	0.004	7.441e-09
depression	rs5995992	T	C	-0.0266	0.0039	1.3e-11

## Sheet: FinnGen
Phenotype	SNP	effect_allele	other_allele	beta	se	pval
FinnGen	rs301799	T	C	0.0301	0.0103	0.003552
FinnGen	rs1002656	T	C	0.0086	0.0106	0.4159
FinnGen	rs1466887	T	C	-0.0206	0.01	0.03907
FinnGen	rs11579246	G	A	-0.0012	0.0136	0.927
FinnGen	rs1890946	C	T	-0.0053	0.0098	0.5917
FinnGen	rs10789214	T	C	0.013	0.0099	0.192
FinnGen	rs2568958	A	G	0.0027	0.0103	0.7917
FinnGen	rs10890020	G	A	0.0201	0.0098	0.04094
FinnGen	rs113188507	A	G	0.0149	0.0124	0.2267
FinnGen	rs10913112	T	C	-0.0207	0.0102	0.04211
FinnGen	rs72710803	C	A	0.0767	0.0284	0.006835
FinnGen	rs169235	G	A	-0.0035	0.0115	0.7605
FinnGen	rs17641524	T	C	0.0472	0.0139	0.0006829
FinnGen	rs12052908	A	T	0.0033	0.01	0.7413
FinnGen	rs1568452	T	C	0.0048	0.0103	0.645
FinnGen	rs7585722	C	T	-0.0045	0.0171	0.7938
FinnGen	rs1226412	T	C	-0.0083	0.0114	0.4703
FinnGen	rs62188629	A	G	0.0054	0.0103	0.6003
FinnGen	rs4346585	C	T	0.0055	0.0104	0.5955
FinnGen	rs13084037	A	G	-0.0304	0.0134	0.02326
FinnGen	rs7624336	T	G	-0.0109	0.0133	0.4116
FinnGen	rs141954845	G	A	-0.0061	0.0099	0.5405
FinnGen	rs6783233	T	C	-0.0149	0.012	0.2146
FinnGen	rs1095626	C	T	-0.0215	0.0098	0.02875
FinnGen	rs7685686	G	A	-0.028	0.0099	0.004566
FinnGen	rs34937911	C	T	-0.0163	0.0156	0.295
FinnGen	rs45510091	G	A	0.0007	0.0228	0.9748
FinnGen	rs35553410	C	T	-0.0219	0.0114	0.05523
FinnGen	rs7659414	C	A	-0.0043	0.0102	0.6774
FinnGen	rs60157091	T	C	0.0235	0.0098	0.01668
FinnGen	rs3099439	T	C	-0.0094	0.0099	0.3428
FinnGen	rs10061069	C	G	-0.0261	0.018	0.1475
FinnGen	rs30266	A	G	0.008	0.0108	0.4617
FinnGen	rs11135349	C	A	-0.0137	0.0101	0.1733
FinnGen	rs200949	G	A	-0.0315	0.0207	0.1279
FinnGen	rs9363467	T	C	0.0001	0.01	0.989
FinnGen	rs7758630	A	T	0.005	0.0101	0.6227
FinnGen	rs1933802	G	C	0.0103	0.0099	0.2998
FinnGen	rs2876520	G	C	-0.0196	0.01	0.04973
FinnGen	rs725616	C	T	-0.0023	0.01	0.8166
FinnGen	rs2029865	A	T	-0.032	0.0099	0.00127
FinnGen	rs3823624	C	T	-0.0335	0.011	0.002246
FinnGen	rs2043539	A	G	0.0342	0.0102	0.0007559
FinnGen	rs2247523	G	C	0.0096	0.0098	0.3279
FinnGen	rs16887442	C	T	0.0043	0.0099	0.661
FinnGen	rs58104186	A	G	0.0023	0.0099	0.8136
FinnGen	rs7807677	T	C	0.0123	0.0102	0.2246
FinnGen	rs7837935	G	T	0.0128	0.0151	0.3971
FinnGen	rs1354115	A	C	0.0148	0.0103	0.153
FinnGen	rs1982277	C	T	-0.0002	0.0125	0.9881
FinnGen	rs263645	T	A	-0.0028	0.0099	0.778
FinnGen	rs3793577	G	A	0.0009	0.0099	0.9255
FinnGen	rs59283172	G	A	-0.0201	0.0145	0.1651
FinnGen	rs34653192	C	G	-0.0121	0.0109	0.2643
FinnGen	rs7030813	T	C	0.0196	0.0099	0.04673
FinnGen	rs10817969	G	T	0.0064	0.0105	0.5423
FinnGen	rs913930	A	G	-0.0091	0.0101	0.3662
FinnGen	rs2670139	C	T	0.0057	0.0102	0.577
FinnGen	rs997934	C	T	-0.0002	0.0099	0.9805
FinnGen	rs1021363	G	A	-0.0007	0.011	0.9492
FinnGen	rs1448938	G	A	-0.0218	0.0098	0.02617
FinnGen	rs2509805	C	T	0.0083	0.0102	0.4152
FinnGen	rs198457	T	C	-0.0131	0.0164	0.4243
FinnGen	rs58621819	T	A	-0.0035	0.0156	0.8247
FinnGen	rs7117514	G	A	0.0104	0.0099	0.2943
FinnGen	rs7932640	C	T	0.0127	0.0099	0.1985
FinnGen	rs61902811	A	G	-0.0255	0.0122	0.03574
FinnGen	rs2187490	G	T	-0.0342	0.0179	0.05679
FinnGen	rs57344483	G	A	0.013	0.0148	0.3792
FinnGen	rs78337797	G	T	-0.0293	0.0167	0.0793
FinnGen	rs56314503	G	T	0.0185	0.0119	0.1193
FinnGen	rs10774600	C	T	0.0108	0.0151	0.4732
FinnGen	rs3213572	A	G	0.0038	0.0099	0.7029
FinnGen	rs1409379	T	C	0.0108	0.0106	0.3075
FinnGen	rs1343605	C	A	-0.0043	0.0102	0.6702
FinnGen	rs9592461	G	A	-0.0112	0.0099	0.2541
FinnGen	rs4772087	T	C	0.012	0.01	0.2312
FinnGen	rs61990288	A	G	-0.0023	0.0098	0.8119
FinnGen	rs1956373	T	G	0.0159	0.0126	0.2087
FinnGen	rs1152578	C	T	-0.0043	0.0099	0.664
FinnGen	rs1045430	G	T	0.026	0.0098	0.00803
FinnGen	rs10149470	G	A	0.0139	0.0099	0.1604
FinnGen	rs8037355	T	C	-0.01	0.0099	0.3089
FinnGen	rs34488670	C	T	-0.008	0.0118	0.4977
FinnGen	rs7193263	A	G	-0.0056	0.0102	0.5829
FinnGen	rs7198928	C	T	0.0355	0.0105	0.0007377
FinnGen	rs7200826	T	C	0.0126	0.0104	0.2268
FinnGen	rs56887639	G	A	-0.0007	0.0105	0.9491
FinnGen	rs12923444	C	A	0.0092	0.0101	0.3624
FinnGen	rs75581564	A	G	-0.0206	0.0145	0.1548
FinnGen	rs12967855	G	A	-0.0159	0.0111	0.1526
FinnGen	rs7227069	A	G	-0.0021	0.01	0.8332
FinnGen	rs62091461	T	C	-0.017	0.0105	0.1036
FinnGen	rs12966052	C	G	0.0386	0.0125	0.001991
FinnGen	rs12967143	C	G	-0.0046	0.0113	0.6813
FinnGen	rs7241572	A	G	0.0299	0.012	0.01255
FinnGen	rs33431	T	C	0.0086	0.0103	0.4024
FinnGen	rs143186028	T	G	-0.0232	0.0113	0.0406
FinnGen	rs12624433	A	G	0.0077	0.0112	0.4925
FinnGen	rs5995992	C	T	0.0142	0.0106	0.1786

## Sheet: UK Biobank ICD 10
Phenotype	SNP	effect_allele	other_allele	beta	se	pval
ICD 10	rs301799	T	C	0.0233637	0.006506	0.000329997
ICD 10	rs1002656	T	C	-0.00685239	0.00707315	0.33
ICD 10	rs1466887	T	C	-0.00593054	0.00650172	0.36
ICD 10	rs11579246	G	A	-0.0120855	0.0113452	0.29
ICD 10	rs1890946	C	T	-0.00389589	0.00644997	0.55
ICD 10	rs10789214	T	C	0.0166604	0.00649397	0.01
ICD 10	rs2568958	A	G	0.0242227	0.0065569	0.000219999
ICD 10	rs10890020	G	A	0.00367574	0.00642982	0.57
ICD 10	rs113188507	A	G	0.0222256	0.00704314	0.0016
ICD 10	rs10913112	T	C	-0.0123717	0.0066309	0.0619998
ICD 10	rs72710803	C	A	0.0139551	0.0113009	0.22
ICD 10	rs169235	G	A	0.0225151	0.0074585	0.0025
ICD 10	rs17641524	T	C	0.0051848	0.00788444	0.51
ICD 10	rs12052908	T	A	0.031726	0.00648719	1e-06
ICD 10	rs1568452	T	C	-0.0101892	0.00662198	0.12
ICD 10	rs7585722	C	T	0.00358614	0.00891811	0.69
ICD 10	rs1226412	T	C	-0.0122063	0.00796179	0.13
ICD 10	rs62188629	A	G	0.0228863	0.00694162	0.000980009
ICD 10	rs4346585	C	T	0.0100572	0.00694461	0.15
ICD 10	rs13084037	A	G	-0.0217546	0.00769094	0.00470002
ICD 10	rs7624336	T	G	-0.0117688	0.00785637	0.13
ICD 10	rs141954845	G	A	-0.0119814	0.00654652	0.0669993
ICD 10	rs6783233	T	C	0.00308512	0.00713765	0.67
ICD 10	rs1095626	C	T	-0.0258065	0.00651213	7.39997e-05
ICD 10	rs7685686	G	A	-0.0103396	0.00650895	0.11
ICD 10	rs34937911	C	T	0.0001255	0.0101023	0.99
ICD 10	rs45510091	G	A	-0.0375815	0.0141156	0.00779992
ICD 10	rs35553410	C	T	0.0111647	0.00736985	0.13
ICD 10	rs7659414	C	A	0.00561735	0.00650266	0.39
ICD 10	rs60157091	T	C	0.0120314	0.00642235	0.061
ICD 10	rs3099439	T	C	6.20557e-05	0.00647918	0.99
ICD 10	rs10061069	C	G	0.00273791	0.00768684	0.719999
ICD 10	rs30266	A	G	0.00655934	0.00684744	0.34
ICD 10	rs11135349	C	A	-0.0043464	0.00643361	0.5
ICD 10	rs200949	G	A	-0.00367054	0.00921627	0.69
ICD 10	rs9363467	C	T	-0.00848932	0.0065922	0.2
ICD 10	rs7758630	A	T	0.00426219	0.00655497	0.52
ICD 10	rs1933802	G	C	0.0232597	0.00645545	0.000309999
ICD 10	rs2876520	G	C	0.00375596	0.00649785	0.56
ICD 10	rs725616	C	T	-0.00642435	0.00668525	0.34
ICD 10	rs2029865	A	T	-0.0132477	0.00645077	0.04
ICD 10	rs3823624	C	T	-0.0345653	0.00835167	3.50002e-05
ICD 10	rs2043539	A	G	0.0211715	0.00650585	0.00109999
ICD 10	rs2247523	G	C	0.0156361	0.00644113	0.015
ICD 10	rs16887442	C	T	-0.00876583	0.00649042	0.18
ICD 10	rs58104186	A	G	0.00905302	0.00649026	0.16
ICD 10	rs7807677	T	C	-0.00800828	0.00645855	0.21
ICD 10	rs7837935	G	T	0.0168974	0.008794	0.0549997
ICD 10	rs1354115	A	C	0.00462069	0.00666274	0.49
ICD 10	rs1982277	C	T	-0.0261506	0.00746831	0.000460002
ICD 10	rs263645	T	A	-0.00997546	0.00646411	0.12
ICD 10	rs3793577	G	A	-0.0118135	0.00650972	0.0700003
ICD 10	rs59283172	G	A	-0.011822	0.0103142	0.25
ICD 10	rs34653192	C	G	-0.00667223	0.00695877	0.34
ICD 10	rs7030813	T	C	0.0162745	0.00666965	0.015
ICD 10	rs10817969	G	T	-0.00744673	0.00715496	0.3
ICD 10	rs913930	A	G	-0.00867967	0.00677168	0.2
ICD 10	rs2670139	C	T	0.0083969	0.00761544	0.27
ICD 10	rs997934	C	T	-0.00593344	0.00663119	0.37
ICD 10	rs1021363	G	A	-0.00562208	0.00671769	0.4
ICD 10	rs1448938	G	A	-0.0207589	0.00650193	0.00140001
ICD 10	rs2509805	C	T	-0.00968613	0.00690468	0.16
ICD 10	rs198457	T	C	-0.0135157	0.00826395	0.1
ICD 10	rs58621819	T	A	0.00903397	0.00780451	0.25
ICD 10	rs7117514	G	A	-0.00183214	0.00644259	0.780001
ICD 10	rs7932640	C	T	-0.0224583	0.00650695	0.000560003
ICD 10	rs61902811	A	G	-0.0160501	0.00665542	0.016
ICD 10	rs2187490	G	T	-0.00117565	0.0110591	0.92
ICD 10	rs57344483	G	A	0.00824814	0.0121703	0.5
ICD 10	rs78337797	G	T	-0.0231735	0.00985386	0.0189998
ICD 10	rs56314503	G	T	0.0047514	0.00742739	0.52
ICD 10	rs10774600	C	T	-0.00608446	0.00873217	0.49
ICD 10	rs3213572	A	G	0.00859801	0.00643033	0.18
ICD 10	rs1409379	T	C	0.0138476	0.00756034	0.0669993
ICD 10	rs1343605	C	A	-0.00248309	0.00666268	0.709999
ICD 10	rs9592461	G	A	-0.0154718	0.00642924	0.016
ICD 10	rs9545360	A	C	-0.00106245	0.00834853	0.9
ICD 10	rs4772087	T	C	0.0101355	0.00664913	0.13
ICD 10	rs61990288	A	G	-0.0114669	0.00643107	0.0749998
ICD 10	rs1956373	T	G	0.0161238	0.00741555	0.0299999
ICD 10	rs1152578	C	T	-0.0146074	0.00648957	0.0239999
ICD 10	rs1045430	G	T	0.0106091	0.00642097	0.0980009
ICD 10	rs10149470	G	A	0.0104031	0.00643585	0.11
ICD 10	rs8037355	T	C	-0.0108239	0.00645264	0.0929994
ICD 10	rs34488670	C	T	0.0020589	0.00790311	0.79
ICD 10	rs7193263	A	G	0.00369585	0.00691484	0.59
ICD 10	rs7198928	C	T	0.00654747	0.00665958	0.33
ICD 10	rs7200826	T	C	0.00263126	0.00737746	0.719999
ICD 10	rs56887639	G	A	0.00473532	0.00728603	0.52
ICD 10	rs12923444	C	A	-0.00498331	0.00646649	0.44
ICD 10	rs75581564	A	G	-0.0170454	0.00986882	0.0840001
ICD 10	rs12967855	G	A	-0.00452781	0.00685762	0.51
ICD 10	rs7227069	A	G	0.0115789	0.0064971	0.0749998
ICD 10	rs62091461	T	C	-0.0108978	0.00760958	0.15
ICD 10	rs12966052	C	G	0.00285706	0.00835071	0.73
ICD 10	rs12967143	C	G	-0.000870138	0.0070493	0.9
ICD 10	rs7241572	A	G	0.0175707	0.00802751	0.0290001
ICD 10	rs33431	T	C	0.00728481	0.00665163	0.27
ICD 10	rs143186028	T	G	-0.0212767	0.00882265	0.016
ICD 10	rs12624433	A	G	0.00957479	0.00741183	0.2
ICD 10	rs5995992	C	T	0.00714492	0.00710767	0.31

## Sheet: UK Bioabnk Self-reported 
Phenotype	SNP	effect_allele	other_allele	beta	se	pval
Self-reported	rs301799	T	C	0.00551364	0.000907923	1.29999e-09
Self-reported	rs1002656	T	C	0.000858383	0.000987056	0.38
Self-reported	rs1466887	T	C	-0.000923705	0.000907307	0.31
Self-reported	rs11579246	G	A	0.000896545	0.00158322	0.57
Self-reported	rs1890946	C	T	-0.0012272	0.000900094	0.17
Self-reported	rs10789214	T	C	0.00401031	0.000906237	9.59997e-06
Self-reported	rs2568958	A	G	0.00472386	0.000915011	2.39999e-07
Self-reported	rs10890020	G	A	0.00135685	0.000897301	0.13
Self-reported	rs113188507	A	G	0.0030552	0.000982882	0.00189998
Self-reported	rs10913112	T	C	-0.00107233	0.000925354	0.25
Self-reported	rs72710803	C	A	0.00220146	0.00157705	0.16
Self-reported	rs169235	G	A	0.00119862	0.00104085	0.25
Self-reported	rs17641524	T	C	0.00223154	0.00110029	0.0430002
Self-reported	rs12052908	T	A	0.00184337	0.000905209	0.0420001
Self-reported	rs1568452	T	C	-0.00253796	0.00092401	0.00599998
Self-reported	rs7585722	C	T	-0.00113832	0.00124443	0.36
Self-reported	rs1226412	T	C	-0.000459037	0.00111097	0.68
Self-reported	rs62188629	A	G	0.00287645	0.000968619	0.00299999
Self-reported	rs4346585	C	T	-2.28675e-05	0.000969473	0.98
Self-reported	rs13084037	A	G	-0.00161122	0.00107367	0.13
Self-reported	rs7624336	T	G	-0.00314258	0.00109675	0.00420001
Self-reported	rs141954845	G	A	-0.000948314	0.000913892	0.3
Self-reported	rs6783233	T	C	-0.00123491	0.000996423	0.22
Self-reported	rs1095626	C	T	-0.00358684	0.000909103	8e-05
Self-reported	rs7685686	G	A	-0.00268994	0.000908648	0.00309999
Self-reported	rs34937911	C	T	-0.00111081	0.00141028	0.43
Self-reported	rs45510091	G	A	-0.00153158	0.00197064	0.44
Self-reported	rs35553410	C	T	0.00199993	0.00102885	0.0519996
Self-reported	rs7659414	C	A	-0.000412885	0.000907803	0.649999
Self-reported	rs60157091	T	C	0.00294968	0.000896584	0.001
Self-reported	rs3099439	T	C	-0.000509684	0.000904534	0.57
Self-reported	rs10061069	C	G	0.000978429	0.00107312	0.36
Self-reported	rs30266	A	G	0.00078268	0.000955932	0.41
Self-reported	rs11135349	C	A	-0.00220704	0.000898155	0.0140001
Self-reported	rs200949	G	A	-0.00234679	0.00128652	0.0680002
Self-reported	rs9363467	C	T	-0.0010802	0.00092023	0.24
Self-reported	rs7758630	A	T	0.000731432	0.000915021	0.42
Self-reported	rs1933802	G	C	0.0018096	0.00090115	0.0449997
Self-reported	rs2876520	G	C	-0.00100946	0.000907065	0.27
Self-reported	rs725616	C	T	-0.00104276	0.000933229	0.26
Self-reported	rs2029865	A	T	-0.00287261	0.000900484	0.00140001
Self-reported	rs3823624	C	T	-0.00501097	0.001166	1.7e-05
Self-reported	rs2043539	A	G	0.00225983	0.000908299	0.0129999
Self-reported	rs2247523	G	C	-0.000306688	0.000899278	0.73
Self-reported	rs16887442	C	T	-1.53712e-05	0.000906167	0.99
Self-reported	rs58104186	A	G	0.00229625	0.000906138	0.0109999
Self-reported	rs7807677	T	C	-0.000527891	0.000901704	0.56
Self-reported	rs7837935	G	T	0.00154672	0.00122803	0.21
Self-reported	rs1354115	A	C	0.000379519	0.000930546	0.68
Self-reported	rs1982277	C	T	-0.00334265	0.00104305	0.00140001
Self-reported	rs263645	T	A	-0.00128197	0.000902783	0.16
Self-reported	rs3793577	G	A	0.000568226	0.000909166	0.53
Self-reported	rs59283172	G	A	0.000232383	0.0014405	0.87
Self-reported	rs34653192	C	G	0.000536633	0.000971886	0.58
Self-reported	rs7030813	T	C	0.00281749	0.00093149	0.0025
Self-reported	rs10817969	G	T	-0.000247199	0.000999263	0.8
Self-reported	rs913930	A	G	-0.00205533	0.000945738	0.0299999
Self-reported	rs2670139	C	T	0.00260532	0.0010636	0.0140001
Self-reported	rs997934	C	T	0.000226929	0.000925797	0.81
Self-reported	rs1021363	G	A	0.000301705	0.000937871	0.75
Self-reported	rs1448938	G	A	-0.00419662	0.000907929	3.79997e-06
Self-reported	rs2509805	C	T	0.000840875	0.000964134	0.38
Self-reported	rs198457	T	C	-0.00117488	0.00115395	0.31
Self-reported	rs58621819	T	A	0.000895626	0.00108981	0.41
Self-reported	rs7117514	G	A	0.000305683	0.000899632	0.73
Self-reported	rs7932640	C	T	-0.00296503	0.000908607	0.00109999
Self-reported	rs61902811	A	G	-0.00286288	0.000929346	0.0021
Self-reported	rs2187490	G	T	-0.0010387	0.00154428	0.5
Self-reported	rs57344483	G	A	-0.000102261	0.00169941	0.95
Self-reported	rs78337797	G	T	-0.00123532	0.00137554	0.37
Self-reported	rs56314503	G	T	0.00226399	0.00103685	0.0290001
Self-reported	rs10774600	C	T	-0.00144496	0.00121899	0.24
Self-reported	rs3213572	A	G	0.00157497	0.000897638	0.0790005
Self-reported	rs1409379	T	C	0.00049181	0.00105617	0.64
Self-reported	rs1343605	C	A	1.90502e-05	0.000930775	0.98
Self-reported	rs9592461	G	A	-0.0017117	0.000898155	0.0569994
Self-reported	rs9545360	A	C	-0.000105572	0.00116629	0.93
Self-reported	rs4772087	T	C	0.00151802	0.000928885	0.1
Self-reported	rs61990288	A	G	-0.00137141	0.000898599	0.13
Self-reported	rs1956373	T	G	0.00149698	0.00103615	0.15
Self-reported	rs1152578	C	T	-0.000586272	0.000906767	0.52
Self-reported	rs1045430	G	T	0.00237943	0.000897175	0.008
Self-reported	rs10149470	G	A	0.00274407	0.000899258	0.00230001
Self-reported	rs8037355	T	C	-0.00188513	0.000901442	0.0369999
Self-reported	rs34488670	C	T	0.00175716	0.00110404	0.11
Self-reported	rs7193263	A	G	0.000213325	0.000965903	0.83
Self-reported	rs7198928	C	T	0.0026282	0.000930219	0.00470002
Self-reported	rs7200826	T	C	0.00062977	0.00103052	0.54
Self-reported	rs56887639	G	A	0.000977573	0.00101774	0.34
Self-reported	rs12923444	C	A	-0.0022637	0.00090327	0.012
Self-reported	rs75581564	A	G	-0.00291291	0.00137834	0.0350002
Self-reported	rs12967855	G	A	-0.00029399	0.000958104	0.760001
Self-reported	rs7227069	A	G	-0.00047995	0.000907742	0.6
Self-reported	rs62091461	T	C	-0.00089729	0.00106319	0.4
Self-reported	rs12966052	C	G	0.000228783	0.00116675	0.84
Self-reported	rs12967143	C	G	-0.000333091	0.000984883	0.74
Self-reported	rs7241572	A	G	0.0017465	0.00112156	0.12
Self-reported	rs33431	T	C	0.00150754	0.000929175	0.1
Self-reported	rs143186028	T	G	-0.00217737	0.00123253	0.0769999
Self-reported	rs12624433	A	G	0.00133049	0.00103544	0.2
Self-reported	rs5995992	C	T	0.00133327	0.000993352	0.18
