# Supplementary material for: Genetic liability to mental disorders in relation to the risk of hypertension
Source: Front Cardiovasc Med. 2023 Feb 27;10:1087251. doi: 10.3389/fcvm.2023.1087251 (PMC10008891; doi:10.3389/fcvm.2023.1087251)
Supplement: Supplementary file 5 [file Table_5.XLSX]

## Sheet: Sheet1
			Sensitivity analyses
			IVW		Weighted median		MR-Egger			MR-PRESSO
Mental health		SNPs	OR (95% CI)	P	OR (95% CI)	P	OR (95% CI)	P	P of MR-Egger intercept	SNPs	OR (95% CI)	P
Anxiety disorder
	FinnGen	5	1.01 (0.86–1.19)	0.891	0.97 (0.87–1.08)	0.599	0.56 (0.06–5.34)	0.647	0.64	4*	0.93 (0.86–1.01)	0.177
	UK Biobank	5	1.05 (0.96–1.15)	0.258	1.00 (0.92–1.08)	0.96	1.45 (0.41–5.11)	0.607	0.656	5	1.05 (0.96–1.15)	0.258
	Pooled		1.04 (0.96–1.13)	0.293
ADHD
	FinnGen	9	0.98 (0.91–1.07)	0.711	1.06 (0.94–1.19)	0.321	1.25 (0.89–1.75)	0.24	0.199	9	0.98 (0.91–1.07)	0.711
	UK Biobank	8	1.10 (1.00–1.19)	0.041	1.11 (1.02–1.21)	0.012	0.98 (0.67–1.43)	0.907	0.568	8	1.10 (1.00–1.19)	0.041
	Pooled		1.03 (0.97–1.10)	0.261
Autism spectrum disorder
	FinnGen	2	1.19 (0.83–1.71)	0.352	NA	NA	NA	NA	NA	NA	NA	NA
	UK Biobank	2	0.97 (0.66–1.42)	0.869	NA	NA	NA	NA	NA	NA	NA	NA
	Pooled		1.08 (0.83–1.40)	0.576
Depression
	FinnGen	100	1.18 (1.05–1.34)	0.007	1.21 (1.06–1.38)	0.00592	0.69 (0.33–1.46)	0.338	0.157	97*	1.24 (1.11–1.39)	0.000268
	UK Biobank	101	1.29 (1.18–1.41)	2.12e-08	1.33 (1.21–1.46)	1.85e-09	0.97 (0.58–1.64)	0.919	0.285	97*	1.33 (1.23–1.44)	3.32e-10
	Pooled		1.25 (1.17–1.35)	9.43e-08
Neuroticism
	FinnGen	81	0.99 (0.79–1.23)	0.923	1.01 (0.79–1.28)	0.959	1.77 (0.51–6.14)	0.368	0.352	79*	0.99 (0.80–1.22)	0.906
	UK Biobank	84	1.27 (1.08–1.50)	0.00411	1.29 (1.10–1.51)	0.00198	0.99 (0.42–2.37)	0.986	0.572	78*	1.34 (1.17–1.54)	8.16e-05
	Pooled		1.16 (1.02–1.33)	0.024
PTSD
	FinnGen	2	0.89 (0.77–1.03)	0.117	NA	NA	NA	NA	NA	NA	NA	NA
	UK Biobank	2	1.02 (0.85–1.22)	0.829	NA	NA	NA	NA	NA	NA	NA	NA
	Pooled		0.94 (0.84–1.05)	0.28
Schizophrenia
	FinnGen	109	0.98 (0.95–1.02)	0.337	0.99 (0.94–1.03)	0.508	0.96 (0.84–1.10)	0.538	0.694	109	0.98 (0.95–1.02)	0.337
	UK Biobank	108	0.98 (0.95–1.01)	0.169	1.01 (0.98–1.04)	0.454	1.01 (0.89–1.15)	0.824	0.584	105*	0.98 (0.96–1.01)	0.257
	Pooled		0.98 (0.96–1.00)	0.096
Subjective well-being
	FinnGen	3	1.00 (0.60–1.68)	0.992	NA	NA	NA	NA	NA	NA	NA	NA
	UK Biobank	3	1.39 (0.45–4.25)	0.563	NA	NA	NA	NA	NA	NA	NA	NA
	Pooled		1.06 (0.67–1.68)	0.802
*One or more outliers excluded. P values below the Bonferroni-corrected threshold for number of mental health of 6.25×10-3 are shown in bold and suggestive P values between 0.05 and 6.25×10-3 are shown in bold-italic. ADHA indicates attention deficit/hyperactivity disorder; CI, confidence interval; IVW, inverse-variance weighted; MR, Mendelian randomization; MR-PRESSO, MR-pleiotropy residual sum …
