# Supplementary material for: Genetic liability to mental disorders in relation to the risk of hypertension
Source: Front Cardiovasc Med. 2023 Feb 27;10:1087251. doi: 10.3389/fcvm.2023.1087251 (PMC10008891; doi:10.3389/fcvm.2023.1087251)
Supplement: Supplementary file 6 [file Table_6.XLSX]

## Sheet: Neuroticism
Phenotype	SNP	effect_allele	other_allele	beta	se	pval
neuroticism	rs12137398	T	C	0.0171	0.0029	3.36e-09
neuroticism	rs11576073	A	G	0.0153	0.0023	2.95e-11
neuroticism	rs17096778	G	A	-0.0329	0.0056	3.99e-09
neuroticism	rs7536102	C	T	-0.0148	0.0025	5.51e-09
neuroticism	rs2488401	T	C	-0.0175	0.0029	9.69e-10
neuroticism	rs17432675	C	T	-0.0138	0.0025	1.73e-08
neuroticism	rs4396680	A	G	0.0161	0.0028	7.42e-09
neuroticism	rs10188070	A	G	-0.0142	0.0024	2.55e-09
neuroticism	rs2042555	A	G	0.0169	0.0023	2.84e-13
neuroticism	rs1226574	C	G	-0.0178	0.0028	2.44e-10
neuroticism	rs10497655	C	T	-0.0143	0.0024	4.08e-09
neuroticism	rs78720888	A	C	-0.0181	0.0033	3.06e-08
neuroticism	rs6737187	A	G	-0.0141	0.0025	1.44e-08
neuroticism	rs9867227	A	G	0.0167	0.0025	4.9e-11
neuroticism	rs1542212	G	T	0.016	0.0023	8.62e-12
neuroticism	rs836927	A	C	0.0163	0.0023	2.54e-12
neuroticism	rs59382200	G	A	-0.0127	0.0023	4.7e-08
neuroticism	rs655836	C	T	-0.0163	0.0023	1.16e-12
neuroticism	rs4585149	T	C	-0.0173	0.003	8.27e-09
neuroticism	rs6828271	C	T	-0.0138	0.0023	1.29e-09
neuroticism	rs1501673	A	G	0.0202	0.0034	1.98e-09
neuroticism	rs11240962	A	C	0.0173	0.0028	4.66e-10
neuroticism	rs4868748	G	A	0.0152	0.0026	3.3e-09
neuroticism	rs2031595	T	C	-0.0149	0.0026	5.41e-09
neuroticism	rs2071303	C	T	-0.0137	0.0024	9.73e-09
neuroticism	rs200965	A	G	-0.0167	0.0029	9.42e-09
neuroticism	rs28986304	C	T	0.0212	0.0035	9.3e-10
neuroticism	rs2503775	A	G	0.0211	0.0034	4.53e-10
neuroticism	rs240769	A	C	-0.0141	0.0023	1.37e-09
neuroticism	rs2056477	C	G	-0.015	0.0027	2.83e-08
neuroticism	rs11509880	A	G	0.0148	0.0024	8.32e-10
neuroticism	rs10274968	C	T	-0.0127	0.0023	2.25e-08
neuroticism	rs274632	A	C	-0.0129	0.0023	1.97e-08
neuroticism	rs35048193	T	G	0.0164	0.0023	4.83e-13
neuroticism	rs2407746	G	C	0.0172	0.0025	3.93e-12
neuroticism	rs7818437	C	T	0.0193	0.0031	3.43e-10
neuroticism	rs28639817	G	A	0.0198	0.0033	3.14e-09
neuroticism	rs2380937	C	T	-0.0136	0.0023	4.8e-09
neuroticism	rs62550480	T	C	-0.0175	0.0027	1.7e-10
neuroticism	rs10811883	C	T	0.017	0.0024	1.64e-12
neuroticism	rs10119773	A	G	-0.0155	0.0023	2.89e-11
neuroticism	rs12344656	A	G	-0.0137	0.0024	6.39e-09
neuroticism	rs78046549	T	C	0.0235	0.0037	1.55e-10
neuroticism	rs75614054	T	C	0.0303	0.004	3.69e-14
neuroticism	rs7025144	T	C	0.0175	0.0025	5.88e-12
neuroticism	rs860626	G	T	-0.0148	0.0025	4.95e-09
neuroticism	rs4757136	T	A	0.0159	0.0023	4.78e-12
neuroticism	rs297343	T	G	0.0156	0.0024	3.75e-11
neuroticism	rs1806153	T	G	0.0169	0.0027	3.87e-10
neuroticism	rs12283653	G	A	0.013	0.0023	3.21e-08
neuroticism	rs7107356	A	G	-0.0156	0.0023	6.39e-12
neuroticism	rs10896636	G	C	0.0161	0.0024	2.5e-11
neuroticism	rs10830220	G	C	0.0138	0.0023	1.77e-09
neuroticism	rs7111031	C	A	-0.0193	0.0023	1.99e-16
neuroticism	rs11605020	G	A	-0.0129	0.0023	2.26e-08
neuroticism	rs167915	T	A	-0.0131	0.0024	3.62e-08
neuroticism	rs9971907	G	A	0.0132	0.0024	2.82e-08
neuroticism	rs11608355	C	T	0.0193	0.0024	2.83e-15
neuroticism	rs3741475	A	G	0.0174	0.0029	1.03e-09
neuroticism	rs6490177	A	C	0.0184	0.003	6.1e-10
neuroticism	rs3124426	C	T	0.0154	0.0027	1.89e-08
neuroticism	rs4444227	T	C	-0.0164	0.0027	1.95e-09
neuroticism	rs1892350	G	A	0.0139	0.0023	1.03e-09
neuroticism	rs7999314	T	G	0.0138	0.0024	1.4e-08
neuroticism	rs1778377	A	T	-0.0154	0.0025	1.72e-09
neuroticism	rs11627348	A	C	0.0188	0.0032	4.43e-09
neuroticism	rs1275411	C	T	-0.0137	0.0024	8.06e-09
neuroticism	rs9671386	G	A	-0.0186	0.0026	8.46e-13
neuroticism	rs12442330	T	C	0.0127	0.0023	2.74e-08
neuroticism	rs4360891	C	T	0.0138	0.0023	1.26e-09
neuroticism	rs3785232	C	T	-0.0175	0.0025	1.29e-12
neuroticism	rs3751855	C	T	-0.0148	0.0023	2.25e-10
neuroticism	rs2042395	G	A	0.015	0.0027	3.11e-08
neuroticism	rs12938775	G	A	0.0152	0.0023	2.2e-11
neuroticism	rs35982947	C	A	-0.0138	0.0024	6.02e-09
neuroticism	rs77804065	T	C	0.0319	0.0027	3.85e-31
neuroticism	rs56084168	T	C	-0.0239	0.0032	7.43e-14
neuroticism	rs10460051	T	C	0.0143	0.0023	2.69e-10
neuroticism	rs11082011	C	T	0.0224	0.0024	2.58e-20
neuroticism	rs11875397	A	T	-0.0168	0.0029	7.82e-09
neuroticism	rs4632195	C	T	-0.0139	0.0023	8.69e-10
neuroticism	rs12958048	A	G	0.0147	0.0024	8.98e-10
neuroticism	rs2425752	T	C	0.0168	0.0026	7.9e-11
neuroticism	rs9611519	T	C	0.0178	0.0025	1.25e-12

## Sheet: FinnGen
Phenotype	SNP	effect_allele	other_allele	beta	se	pval
FinnGen	rs12137398	T	C	0.0077	0.0125	0.538
FinnGen	rs11576073	G	A	0.0023	0.01	0.8182
FinnGen	rs17096778	G	A	-0.0167	0.0351	0.6355
FinnGen	rs7536102	C	T	0.0108	0.0109	0.322
FinnGen	rs2488401	T	C	0.0441	0.0139	0.001542
FinnGen	rs17432675	C	T	-0.0187	0.0103	0.06927
FinnGen	rs4396680	G	A	-0.0112	0.016	0.4838
FinnGen	rs10188070	G	A	-0.0015	0.0104	0.8823
FinnGen	rs2042555	A	G	0.0167	0.0098	0.08875
FinnGen	rs1226574	G	C	-0.0083	0.0114	0.4659
FinnGen	rs10497655	C	T	0.0007	0.0101	0.9485
FinnGen	rs78720888	C	A	0.0113	0.0136	0.4054
FinnGen	rs6737187	A	G	0.0059	0.0107	0.5825
FinnGen	rs9867227	G	A	-0.0149	0.0109	0.1737
FinnGen	rs1542212	G	T	-0.0301	0.0106	0.004712
FinnGen	rs836927	A	C	-0.0174	0.0099	0.07773
FinnGen	rs59382200	G	A	0.0019	0.0099	0.848
FinnGen	rs655836	C	T	0.0121	0.0099	0.2205
FinnGen	rs4585149	C	T	0.0092	0.012	0.4471
FinnGen	rs6828271	T	C	0.0061	0.0099	0.5378
FinnGen	rs1501673	A	G	0.0636	0.0158	5.794e-05
FinnGen	rs11240962	A	C	-0.0031	0.0132	0.8114
FinnGen	rs4868748	G	A	-0.0223	0.0103	0.03095
FinnGen	rs2031595	C	T	-0.0234	0.0102	0.02224
FinnGen	rs2071303	C	T	0.0215	0.0103	0.03742
FinnGen	rs200965	A	G	0.0002	0.015	0.9888
FinnGen	rs28986304	C	T	-0.0267	0.0204	0.1903
FinnGen	rs2503775	G	A	-0.0232	0.0158	0.1416
FinnGen	rs240769	C	A	-0.0112	0.0102	0.2738
FinnGen	rs2056477	A	G	0.1148	0.0409	0.005003
FinnGen	rs11509880	A	G	0.0291	0.0105	0.005684
FinnGen	rs10274968	T	C	0.0033	0.0098	0.7402
FinnGen	rs274632	A	C	-0.0037	0.0101	0.7115
FinnGen	rs35048193	T	G	-0.0108	0.0099	0.2741
FinnGen	rs2407746	G	C	-0.0145	0.0103	0.1567
FinnGen	rs7818437	C	T	-0.0215	0.0136	0.1138
FinnGen	rs28639817	G	A	0.0148	0.013	0.2553
FinnGen	rs2380937	T	C	0.0063	0.0109	0.5641
FinnGen	rs62550480	T	C	-0.0011	0.0132	0.9308
FinnGen	rs10811883	T	C	0.0055	0.0102	0.5907
FinnGen	rs10119773	G	A	0.001	0.0099	0.9211
FinnGen	rs12344656	A	G	-0.0056	0.0101	0.5795
FinnGen	rs78046549	T	C	0.0102	0.0154	0.5073
FinnGen	rs75614054	T	C	0.0198	0.016	0.215
FinnGen	rs7025144	C	T	-0.0162	0.0125	0.1961
FinnGen	rs860626	G	T	0.0072	0.0102	0.4822
FinnGen	rs4757136	A	T	0.0132	0.0099	0.1797
FinnGen	rs297343	G	T	0.016	0.0114	0.1623
FinnGen	rs1806153	T	G	-0.0169	0.0114	0.1383
FinnGen	rs12283653	G	A	0.025	0.0103	0.01506
FinnGen	rs7107356	G	A	0.0331	0.0101	0.001027
FinnGen	rs10896636	G	C	-0.0134	0.0101	0.183
FinnGen	rs10830220	C	G	0.0076	0.0099	0.4418
FinnGen	rs7111031	A	C	0.0257	0.0122	0.03441
FinnGen	rs11605020	A	G	-0.0119	0.01	0.2363
FinnGen	rs167915	T	A	-0.0077	0.01	0.44
FinnGen	rs9971907	G	A	0.0068	0.0101	0.5001
FinnGen	rs11608355	C	T	-0.0326	0.0117	0.005505
FinnGen	rs3741475	A	G	0.0216	0.0132	0.1017
FinnGen	rs6490177	A	C	-0.0013	0.0128	0.92
FinnGen	rs3124426	T	C	-0.0013	0.012	0.9114
FinnGen	rs4444227	T	C	-0.0079	0.011	0.4736
FinnGen	rs1892350	G	A	-0.0071	0.0099	0.4727
FinnGen	rs7999314	T	G	-0.0012	0.0107	0.9115
FinnGen	rs1778377	T	A	-0.0087	0.0108	0.4236
FinnGen	rs11627348	A	C	0.0112	0.0157	0.4736
FinnGen	rs9671386	A	G	0.0117	0.0116	0.3136
FinnGen	rs12442330	C	T	0.0233	0.01	0.01956
FinnGen	rs4360891	T	C	0.0084	0.0098	0.3933
FinnGen	rs3785232	T	C	-0.0416	0.0111	0.0001875
FinnGen	rs3751855	C	T	0.0069	0.01	0.4883
FinnGen	rs2042395	A	G	-0.0015	0.0117	0.8995
FinnGen	rs35982947	C	A	-0.0142	0.0106	0.1793
FinnGen	rs77804065	T	C	0.0018	0.016	0.9087
FinnGen	rs56084168	T	C	0.0102	0.0127	0.424
FinnGen	rs10460051	T	C	0.0271	0.0099	0.005931
FinnGen	rs11082011	T	C	-0.0162	0.0111	0.1456
FinnGen	rs11875397	A	T	-0.0154	0.014	0.2711
FinnGen	rs4632195	T	C	-0.0006	0.0099	0.9515
FinnGen	rs12958048	G	A	-0.0058	0.0113	0.606
FinnGen	rs2425752	C	T	-0.0118	0.0109	0.2761
FinnGen	rs9611519	T	C	0.0129	0.0106	0.2204

## Sheet: UK Biobank ICD 10
Phenotype	SNP	effect_allele	other_allele	beta	se	pval
ICD 10	rs12137398	T	C	-0.00424161	0.00812896	0.6
ICD 10	rs11576073	G	A	0.000661196	0.00651216	0.92
ICD 10	rs17096778	G	A	-0.0281625	0.0154841	0.0690001
ICD 10	rs7536102	C	T	-0.007321	0.00716314	0.31
ICD 10	rs2488401	T	C	0.00168683	0.00799226	0.83
ICD 10	rs17432675	C	T	-0.0132149	0.00689043	0.0549997
ICD 10	rs4396680	G	A	-0.001699	0.00791046	0.83
ICD 10	rs10188070	G	A	-0.0034661	0.00673832	0.61
ICD 10	rs2042555	A	G	0.00280439	0.00653183	0.67
ICD 10	rs1226574	G	C	-0.0120716	0.0079562	0.13
ICD 10	rs10497655	C	T	-0.0151674	0.00687828	0.0269998
ICD 10	rs78720888	C	A	0.00885507	0.00923824	0.34
ICD 10	rs6737187	A	G	-0.020534	0.00702683	0.00350002
ICD 10	rs9867227	A	G	-0.00305464	0.00717075	0.67
ICD 10	rs1542212	G	T	-0.00922757	0.00659466	0.16
ICD 10	rs836927	A	C	-0.000790036	0.00653231	0.9
ICD 10	rs59382200	G	A	-0.00643533	0.00656368	0.33
ICD 10	rs655836	C	T	0.0165674	0.00648471	0.0109999
ICD 10	rs4585149	C	T	0.00318996	0.00842414	0.7
ICD 10	rs6828271	T	C	0.0124678	0.00642661	0.0519996
ICD 10	rs1501673	A	G	0.0257852	0.00952493	0.00680002
ICD 10	rs11240962	A	C	0.014516	0.00782496	0.064
ICD 10	rs4868748	G	A	0.00594727	0.00725885	0.41
ICD 10	rs2031595	C	T	0.014416	0.00722442	0.0460002
ICD 10	rs2071303	C	T	0.0308165	0.00675893	5.1e-06
ICD 10	rs200965	A	G	-0.0178027	0.00818131	0.0299999
ICD 10	rs28986304	C	T	-0.00882319	0.00978862	0.37
ICD 10	rs2503775	G	A	-0.0292086	0.009587	0.00230001
ICD 10	rs240769	C	A	0.00457928	0.00653876	0.48
ICD 10	rs2056477	C	G	-0.0341918	0.00766238	8.09991e-06
ICD 10	rs11509880	A	G	0.0214104	0.00682406	0.0017
ICD 10	rs10274968	T	C	0.00794605	0.00643158	0.22
ICD 10	rs274632	A	C	-0.0109325	0.0064883	0.0920005
ICD 10	rs35048193	T	G	0.00658425	0.00642066	0.31
ICD 10	rs2407746	G	C	0.00415644	0.0070038	0.55
ICD 10	rs7818437	C	T	-0.0258791	0.00763627	0.000700003
ICD 10	rs28639817	G	A	-0.0169634	0.00935945	0.0700003
ICD 10	rs2380937	C	T	-0.00843146	0.0065701	0.2
ICD 10	rs62550480	T	C	-0.0228939	0.00774676	0.00309999
ICD 10	rs10811883	T	C	0.014083	0.00674152	0.0369999
ICD 10	rs10119773	G	A	-0.0126311	0.00651051	0.0519996
ICD 10	rs12344656	A	G	-0.00303263	0.00667201	0.649999
ICD 10	rs78046549	T	C	0.00865279	0.0104069	0.41
ICD 10	rs75614054	T	C	0.0178521	0.0113255	0.11
ICD 10	rs7025144	C	T	-0.0121022	0.00720272	0.0929994
ICD 10	rs860626	G	T	0.00501413	0.00713255	0.48
ICD 10	rs4757136	A	T	0.0198152	0.00651707	0.00239999
ICD 10	rs297343	G	T	0.008939	0.00670421	0.18
ICD 10	rs1806153	T	G	0.0118247	0.00764229	0.12
ICD 10	rs12283653	G	A	0.0276147	0.00661201	2.99999e-05
ICD 10	rs7107356	G	A	0.0174341	0.00641869	0.00659994
ICD 10	rs10896636	G	C	0.0093696	0.00678887	0.17
ICD 10	rs10830220	C	G	-0.0109194	0.00646153	0.0909997
ICD 10	rs7111031	A	C	0.0159924	0.00665875	0.016
ICD 10	rs11605020	A	G	0.00382084	0.00649885	0.56
ICD 10	rs167915	T	A	0.00807397	0.00672663	0.23
ICD 10	rs9971907	A	G	-0.00248065	0.00671256	0.709999
ICD 10	rs11608355	C	T	-0.00535121	0.00692609	0.44
ICD 10	rs3741475	A	G	0.0220756	0.00807737	0.00629999
ICD 10	rs6490177	A	C	-0.00638344	0.00840601	0.450001
ICD 10	rs3124426	T	C	-0.0022863	0.00775028	0.77
ICD 10	rs4444227	T	C	0.00880942	0.00776636	0.26
ICD 10	rs1892350	G	A	-0.000537093	0.006425	0.93
ICD 10	rs7999314	T	G	-0.0160574	0.00688571	0.02
ICD 10	rs1778377	T	A	0.00708126	0.00722326	0.33
ICD 10	rs11627348	A	C	0.00491035	0.00902732	0.59
ICD 10	rs1275411	C	T	-0.0140217	0.00673844	0.0369999
ICD 10	rs9671386	A	G	0.00711164	0.00737326	0.33
ICD 10	rs12442330	C	T	-0.00838455	0.00646662	0.19
ICD 10	rs4360891	T	C	-0.00534632	0.00642641	0.41
ICD 10	rs3785232	T	C	0.000926005	0.00691498	0.89
ICD 10	rs3751855	C	T	0.0141013	0.0066013	0.0329997
ICD 10	rs2042395	A	G	0.00819021	0.00764327	0.28
ICD 10	rs12938775	A	G	0.000552929	0.00643226	0.93
ICD 10	rs35982947	C	A	-0.0144107	0.00669594	0.0309999
ICD 10	rs77804065	T	C	-0.00329535	0.00775026	0.67
ICD 10	rs56084168	T	C	-0.0151325	0.00904294	0.0940005
ICD 10	rs10460051	T	C	0.00744679	0.00642762	0.25
ICD 10	rs11082011	T	C	-0.00395022	0.00684206	0.56
ICD 10	rs11875397	A	T	-0.0300739	0.00824137	0.000259998
ICD 10	rs4632195	T	C	0.00872925	0.00643175	0.17
ICD 10	rs12958048	G	A	0.00256745	0.0068121	0.709999
ICD 10	rs2425752	C	T	-0.0116901	0.00732987	0.11
ICD 10	rs9611519	T	C	0.00705926	0.00709985	0.32

## Sheet: UK Bioabnk Self-reported 
Phenotype	SNP	effect_allele	other_allele	beta	se	pval
Self-reported	rs12137398	T	C	-0.00189001	0.00362217	0.6
Self-reported	rs11576073	G	A	0.000294621	0.00290174	0.92
Self-reported	rs17096778	G	A	-0.0125489	0.00689955	0.0690001
Self-reported	rs7536102	C	T	-0.00326215	0.00319181	0.31
Self-reported	rs2488401	T	C	0.00075163	0.00356125	0.83
Self-reported	rs17432675	C	T	-0.00588838	0.00307029	0.0549997
Self-reported	rs4396680	G	A	-0.000757052	0.00352481	0.83
Self-reported	rs10188070	G	A	-0.00154445	0.00300251	0.61
Self-reported	rs2042555	A	G	0.0012496	0.00291051	0.67
Self-reported	rs1226574	G	C	-0.00537897	0.00354519	0.13
Self-reported	rs10497655	C	T	-0.00675841	0.00306488	0.0269998
Self-reported	rs78720888	C	A	0.00394571	0.00411645	0.34
Self-reported	rs6737187	A	G	-0.00914972	0.00313107	0.00350002
Self-reported	rs9867227	A	G	-0.00136111	0.0031952	0.67
Self-reported	rs1542212	G	T	-0.0041117	0.0029385	0.16
Self-reported	rs836927	A	C	-0.000352031	0.00291072	0.9
Self-reported	rs59382200	G	A	-0.00286751	0.0029247	0.33
Self-reported	rs655836	C	T	0.00738226	0.00288951	0.0109999
Self-reported	rs4585149	C	T	0.00142141	0.0037537	0.7
Self-reported	rs6828271	T	C	0.00555549	0.00286362	0.0519996
Self-reported	rs1501673	A	G	0.0114896	0.0042442	0.00680002
Self-reported	rs11240962	A	C	0.00646814	0.00348671	0.064
Self-reported	rs4868748	G	A	0.00265003	0.00323446	0.41
Self-reported	rs2031595	C	T	0.00642359	0.00321912	0.0460002
Self-reported	rs2071303	C	T	0.0137315	0.0030117	5.1e-06
Self-reported	rs200965	A	G	-0.00793269	0.00364549	0.0299999
Self-reported	rs28986304	C	T	-0.00393151	0.00436169	0.37
Self-reported	rs2503775	G	A	-0.013015	0.00427185	0.00230001
Self-reported	rs240769	C	A	0.00204047	0.00291359	0.48
Self-reported	rs2056477	C	G	-0.0152355	0.00341427	8.09991e-06
Self-reported	rs11509880	A	G	0.00954022	0.00304072	0.0017
Self-reported	rs10274968	T	C	0.00354067	0.00286583	0.22
Self-reported	rs274632	A	C	-0.00487141	0.00289111	0.0920005
Self-reported	rs35048193	T	G	0.00293386	0.00286097	0.31
Self-reported	rs2407746	G	C	0.00185206	0.00312081	0.55
Self-reported	rs7818437	C	T	-0.0115314	0.00340263	0.000700003
Self-reported	rs28639817	G	A	-0.0075587	0.00417046	0.0700003
Self-reported	rs2380937	C	T	-0.00375696	0.00292756	0.2
Self-reported	rs62550480	T	C	-0.0102013	0.00345186	0.00309999
Self-reported	rs10811883	T	C	0.00627523	0.00300394	0.0369999
Self-reported	rs10119773	G	A	-0.00562826	0.00290101	0.0519996
Self-reported	rs12344656	A	G	-0.0013513	0.00297297	0.649999
Self-reported	rs78046549	T	C	0.00385558	0.00463721	0.41
Self-reported	rs75614054	T	C	0.00795467	0.00504651	0.11
Self-reported	rs7025144	C	T	-0.0053926	0.00320944	0.0929994
Self-reported	rs860626	G	T	0.00223423	0.00317818	0.48
Self-reported	rs4757136	A	T	0.00882943	0.00290393	0.00239999
Self-reported	rs297343	G	T	0.00398311	0.00298732	0.18
Self-reported	rs1806153	T	G	0.00526897	0.00340531	0.12
Self-reported	rs12283653	G	A	0.0123048	0.00294623	2.99999e-05
Self-reported	rs7107356	G	A	0.00776842	0.00286009	0.00659994
Self-reported	rs10896636	G	C	0.00417498	0.00302504	0.17
Self-reported	rs10830220	C	G	-0.00486556	0.00287918	0.0909997
Self-reported	rs7111031	A	C	0.00712604	0.00296706	0.016
Self-reported	rs11605020	A	G	0.00170252	0.00289581	0.56
Self-reported	rs167915	T	A	0.00359767	0.00299731	0.23
Self-reported	rs9971907	A	G	-0.00110535	0.00299104	0.709999
Self-reported	rs11608355	C	T	-0.00238443	0.00308619	0.44
Self-reported	rs3741475	A	G	0.00983664	0.00359918	0.00629999
Self-reported	rs6490177	A	C	-0.00284438	0.00374562	0.450001
Self-reported	rs3124426	T	C	-0.00101875	0.00345343	0.77
Self-reported	rs4444227	T	C	0.00392537	0.0034606	0.26
Self-reported	rs1892350	G	A	-0.000239322	0.0028629	0.93
Self-reported	rs7999314	T	G	-0.00715499	0.00306819	0.02
Self-reported	rs1778377	T	A	0.00315533	0.0032186	0.33
Self-reported	rs11627348	A	C	0.00218799	0.00402246	0.59
Self-reported	rs1275411	C	T	-0.00624788	0.00300257	0.0369999
Self-reported	rs9671386	A	G	0.00316886	0.00328543	0.33
Self-reported	rs12442330	C	T	-0.00373606	0.00288145	0.19
Self-reported	rs4360891	T	C	-0.00238225	0.00286353	0.41
Self-reported	rs3785232	T	C	0.000412617	0.00308123	0.89
Self-reported	rs3751855	C	T	0.00628336	0.00294146	0.0329997
Self-reported	rs2042395	A	G	0.00364946	0.00340575	0.28
Self-reported	rs12938775	A	G	0.000246379	0.00286614	0.93
Self-reported	rs35982947	C	A	-0.00642123	0.00298363	0.0309999
Self-reported	rs77804065	T	C	-0.00146837	0.00345343	0.67
Self-reported	rs56084168	T	C	-0.00674285	0.00402943	0.0940005
Self-reported	rs10460051	T	C	0.0033182	0.00286407	0.25
Self-reported	rs11082011	T	C	-0.00176017	0.00304874	0.56
Self-reported	rs11875397	A	T	-0.0134006	0.00367226	0.000259998
Self-reported	rs4632195	T	C	0.00388965	0.00286591	0.17
Self-reported	rs12958048	G	A	0.00114403	0.00303539	0.709999
Self-reported	rs2425752	C	T	-0.00520898	0.0032661	0.11
Self-reported	rs9611519	T	C	0.00314552	0.00316361	0.32
