# Supplementary material for: Genetic liability to mental disorders in relation to the risk of hypertension
Source: Front Cardiovasc Med. 2023 Feb 27;10:1087251. doi: 10.3389/fcvm.2023.1087251 (PMC10008891; doi:10.3389/fcvm.2023.1087251)
Supplement: Supplementary file 7 [file Table_7.XLSX]

## Sheet: PTSD
Phenotype	SNP	effect_allele	other_allele	beta	se	pval
PTSD	rs34517852	A	T	0.1095	0.0185	3.164e-09
PTSD	rs9364611	T	C	-0.1239	0.0226	4.359e-08

## Sheet: FinnGen
Phenotype	SNP	effect_allele	other_allele	beta	se	pval
FinnGen	rs34517852	T	A	0.0058	0.0102	0.571
FinnGen	rs9364611	T	C	0.0252	0.0135	0.0619

## Sheet: UK Biobank ICD 10
Phenotype	SNP	effect_allele	other_allele	beta	se	pval
ICD 10	rs34517852	A	T	0.0101102	0.00672858	0.13
ICD 10	rs9364611	T	C	0.011797	0.00957883	0.22

## Sheet: UK Bioabnk Self-reported 
Phenotype	SNP	effect_allele	other_allele	beta	se	pval
Self-reported	rs34517852	A	T	0.000233157	0.00403916	0.95
Self-reported	rs9364611	T	C	0.00928694	0.00575004	0.11
