# Supplementary material for: Genetic liability to mental disorders in relation to the risk of hypertension
Source: Front Cardiovasc Med. 2023 Feb 27;10:1087251. doi: 10.3389/fcvm.2023.1087251 (PMC10008891; doi:10.3389/fcvm.2023.1087251)
Supplement: Supplementary file 8 [file Table_8.XLSX]

## Sheet: Schizophrenia
Phenotype	SNP	effect_allele	other_allele	beta	se	pval
schizophrenia	rs4648845	T	C	0.0695261	0.0117618	8.7e-10
schizophrenia	rs1498232	T	C	0.0667236	0.0113278	2.86e-09
schizophrenia	rs11210892	A	G	-0.0682788	0.0108098	3.39e-10
schizophrenia	rs12129573	A	C	0.0751075	0.0107711	2.03e-12
schizophrenia	rs76869799	C	G	-0.167236	0.0298656	2.64e-08
schizophrenia	rs1702294	T	C	-0.11991	0.0136214	3.36e-19
schizophrenia	rs140505938	T	C	-0.0899247	0.0143109	4.49e-10
schizophrenia	rs6670165	T	C	0.0723207	0.0131189	4.45e-08
schizophrenia	rs7523273	A	G	0.0610951	0.0113911	4.47e-08
schizophrenia	rs10803138	A	G	-0.0693501	0.0124249	2.03e-08
schizophrenia	rs77149735	A	G	0.275356	0.0469697	3.73e-09
schizophrenia	rs14403	T	C	-0.0682788	0.0124117	4.42e-08
schizophrenia	rs11682175	T	C	-0.0693501	0.0102856	1.47e-11
schizophrenia	rs75575209	A	T	-0.103141	0.018878	3.95e-08
schizophrenia	rs3768644	A	G	-0.100926	0.0172026	7.39e-09
schizophrenia	rs2909457	A	G	-0.0576291	0.0106965	4.62e-08
schizophrenia	rs11693094	T	C	-0.0736465	0.0103295	1.53e-12
schizophrenia	rs59979824	A	C	-0.065072	0.0113084	8.41e-09
schizophrenia	rs6434928	A	G	-0.0736465	0.0108674	2.06e-11
schizophrenia	rs6704641	A	G	0.0778865	0.0135069	8.33e-09
schizophrenia	rs11685299	A	C	-0.0629398	0.0107529	1.12e-08
schizophrenia	rs6704768	A	G	-0.0725707	0.0103185	2.32e-12
schizophrenia	rs17194490	T	G	0.0962189	0.0141669	2.69e-11
schizophrenia	rs4330281	T	C	-0.0618754	0.0107415	4.64e-09
schizophrenia	rs75968099	T	C	0.08158	0.0111626	1.05e-13
schizophrenia	rs2535627	T	C	0.0685928	0.00990719	4.26e-11
schizophrenia	rs832187	T	C	-0.0608121	0.0107302	1.43e-08
schizophrenia	rs7432375	A	G	-0.0693501	0.0108213	7.26e-11
schizophrenia	rs9841616	A	T	-0.0779615	0.014143	2.35e-08
schizophrenia	rs215411	A	T	0.0620354	0.0109113	3.06e-08
schizophrenia	rs35518360	A	T	-0.154317	0.0198503	7.98e-15
schizophrenia	rs10520163	T	C	0.0629748	0.00996246	1.47e-09
schizophrenia	rs1106568	A	G	-0.0682788	0.0118783	9.47e-09
schizophrenia	rs1501357	T	C	-0.076881	0.013055	5.05e-09
schizophrenia	rs4391122	A	G	-0.0812101	0.0104071	1.1e-14
schizophrenia	rs16867576	A	G	0.0962189	0.016864	4.61e-09
schizophrenia	rs4388249	T	C	0.0732505	0.0131069	3.05e-08
schizophrenia	rs10043984	T	C	0.0667236	0.0117944	1.09e-08
schizophrenia	rs3849046	T	C	0.0610951	0.0104515	4.67e-09
schizophrenia	rs79212538	T	G	0.1441	0.0249981	7e-09
schizophrenia	rs111294930	A	G	0.0898407	0.0138026	1.06e-10
schizophrenia	rs2973155	T	C	-0.0693501	0.0108213	1.11e-10
schizophrenia	rs12522290	C	G	0.0806579	0.014386	1.99e-08
schizophrenia	rs11740474	A	T	-0.05975	0.010719	3.15e-08
schizophrenia	rs115329265	A	G	0.18648	0.0162512	3.48e-31
schizophrenia	rs1339227	T	C	-0.05975	0.010719	2.69e-08
schizophrenia	rs117074560	T	C	-0.163696	0.0274904	1.64e-09
schizophrenia	rs12704290	A	G	-0.100926	0.0161101	3.33e-10
schizophrenia	rs6466055	A	C	0.0657877	0.0108709	1.13e-09
schizophrenia	rs211829	T	C	0.0592119	0.010471	3.71e-08
schizophrenia	rs13240464	T	C	0.079735	0.0107219	3.03e-13
schizophrenia	rs7801375	A	G	-0.0790432	0.0146949	4.42e-08
schizophrenia	rs3735025	T	C	0.0639133	0.0108911	3.28e-09
schizophrenia	rs10503253	A	C	0.0704585	0.0126794	1.06e-08
schizophrenia	rs73229090	A	C	-0.0965109	0.0171281	2.1e-08
schizophrenia	rs6984242	A	G	-0.0608121	0.0107302	5.97e-09
schizophrenia	rs7819570	T	G	0.0760347	0.0135316	1.22e-08
schizophrenia	rs36068923	A	G	-0.0844692	0.0126118	2.61e-11
schizophrenia	rs4129585	A	C	0.0834216	0.010223	1.74e-15
schizophrenia	rs11139497	A	T	0.0667236	0.0113278	3.61e-09
schizophrenia	rs7893279	T	G	0.117783	0.01651	1.97e-12
schizophrenia	rs7907645	T	G	0.133656	0.0197014	1.27e-11
schizophrenia	rs11191419	A	T	-0.098716	0.0111403	6.2e-19
schizophrenia	rs55833108	T	G	0.0723207	0.0131189	2.23e-08
schizophrenia	rs11027857	A	G	0.0620354	0.00997173	2.55e-09
schizophrenia	rs9420	A	G	0.0657877	0.0113383	2.24e-09
schizophrenia	rs12421382	T	C	-0.0608121	0.0112609	3.7e-08
schizophrenia	rs2514218	T	C	-0.0758017	0.011429	2.75e-11
schizophrenia	rs77502336	C	G	0.0639133	0.0113594	7.54e-09
schizophrenia	rs55661361	A	G	-0.076881	0.0109022	2.8e-12
schizophrenia	rs10791097	T	G	0.0732505	0.0103265	1.09e-12
schizophrenia	rs75059851	A	G	0.0870947	0.0129289	3.87e-11
schizophrenia	rs2007044	A	G	-0.0921153	0.01052	3.22e-18
schizophrenia	rs2239063	A	C	0.064851	0.0113488	1.93e-08
schizophrenia	rs679087	A	C	-0.0608121	0.0112609	3.91e-08
schizophrenia	rs324017	A	C	-0.0640053	0.0112965	2.13e-08
schizophrenia	rs12826178	T	G	-0.167236	0.0241457	2.02e-12
schizophrenia	rs4240748	C	G	-0.058689	0.0107077	4.59e-08
schizophrenia	rs10860964	T	C	0.0582689	0.0109521	4.84e-08
schizophrenia	rs4766428	T	C	0.0657877	0.0108709	1.4e-09
schizophrenia	rs2851447	C	G	-0.0888312	0.0115773	1.86e-14
schizophrenia	rs2068012	T	C	-0.0693501	0.0118909	1.41e-08
schizophrenia	rs2332700	C	G	0.0704585	0.011751	4.86e-09
schizophrenia	rs2693698	A	G	-0.0629398	0.0107529	4.8e-09
schizophrenia	rs12887734	T	G	0.0843411	0.0115908	1.36e-13
schizophrenia	rs56205728	A	G	0.07139	0.0117401	4.18e-09
schizophrenia	rs12903146	A	G	0.064851	0.0104127	3.38e-10
schizophrenia	rs12148337	T	C	0.0582689	0.010009	1.79e-08
schizophrenia	rs8042374	A	G	0.0889262	0.0119945	2.44e-13
schizophrenia	rs190065944	A	G	0.0751075	0.013544	4.71e-08
schizophrenia	rs950169	T	C	-0.080126	0.0120182	1.62e-11
schizophrenia	rs4702	A	G	-0.0812101	0.010949	8.3e-14
schizophrenia	rs9922678	A	G	0.064851	0.0113488	1.28e-08
schizophrenia	rs7405404	T	C	0.0741794	0.0121706	1.01e-09
schizophrenia	rs12691307	A	G	0.0704585	0.0108208	4.55e-11
schizophrenia	rs12325245	A	T	-0.0833816	0.0147579	1.87e-08
schizophrenia	rs8044995	A	G	0.0778865	0.0139663	1.51e-08
schizophrenia	rs4523957	T	G	0.0685928	0.0108408	2.86e-10
schizophrenia	rs8082590	A	G	-0.0629398	0.0112846	1.77e-08
schizophrenia	rs78322266	T	G	0.172271	0.0304254	1.32e-08
schizophrenia	rs9636107	A	G	-0.0725707	0.0103185	3.34e-12
schizophrenia	rs72934570	T	C	-0.13582	0.0206171	1.97e-11
schizophrenia	rs715170	T	C	-0.0672087	0.0118657	1.27e-08
schizophrenia	rs2905426	T	G	-0.0682788	0.0108098	3.63e-10
schizophrenia	rs2053079	A	G	-0.071496	0.0124512	4.49e-09
schizophrenia	rs56873913	T	G	0.0685928	0.0127028	4.69e-08
schizophrenia	rs6065094	A	G	-0.0747235	0.010879	1.46e-11
schizophrenia	rs7267348	T	C	-0.065072	0.0118407	4.56e-08
schizophrenia	rs9607782	A	T	0.0834216	0.0120599	2.07e-11
schizophrenia	rs1023500	T	C	0.0732505	0.0131069	3.43e-08
schizophrenia	rs6002655	T	C	0.0639133	0.0104224	1.71e-09
schizophrenia	rs12845396	A	T	-0.0544562	0.0101351	2.21e-08
schizophrenia	rs1378559	T	C	0.0861777	0.0120271	1.61e-12
schizophrenia	rs5937157	T	G	-0.0640053	0.00969794	1.98e-10

## Sheet: FinnGen
Phenotype	SNP	effect_allele	other_allele	beta	se	pval
FinnGen	rs4648845	T	C	-0.0022	0.0099	0.8282
FinnGen	rs1498232	C	T	0.0016	0.011	0.8821
FinnGen	rs11210892	A	G	0.0022	0.0104	0.8337
FinnGen	rs12129573	A	C	0.0204	0.0103	0.04682
FinnGen	rs76869799	G	C	-0.0214	0.03	0.4768
FinnGen	rs1702294	C	T	-0.009	0.011	0.4137
FinnGen	rs140505938	T	C	-0.0147	0.0139	0.2907
FinnGen	rs6670165	T	C	0.0245	0.0143	0.08755
FinnGen	rs7523273	G	A	-0.0111	0.0102	0.2739
FinnGen	rs10803138	G	A	-0.0072	0.0113	0.5233
FinnGen	rs77149735	A	G	-0.0033	0.0223	0.8838
FinnGen	rs14403	T	C	0.0074	0.012	0.5405
FinnGen	rs11682175	C	T	0.0017	0.0101	0.8685
FinnGen	rs75575209	A	T	-0.0202	0.0196	0.3007
FinnGen	rs3768644	A	G	0.0283	0.0163	0.0826
FinnGen	rs2909457	A	G	0.0022	0.0103	0.8311
FinnGen	rs11693094	T	C	-0.0006	0.0099	0.9514
FinnGen	rs59979824	A	C	0.0054	0.0107	0.6157
FinnGen	rs6434928	A	G	0.007	0.01	0.4811
FinnGen	rs6704641	A	G	0.0335	0.0156	0.03171
FinnGen	rs11685299	A	C	-0.0027	0.0107	0.7982
FinnGen	rs6704768	A	G	0.0062	0.0098	0.5281
FinnGen	rs17194490	T	G	0.0097	0.0141	0.4922
FinnGen	rs4330281	C	T	-0.0132	0.0099	0.1802
FinnGen	rs75968099	T	C	0.0001	0.0106	0.992
FinnGen	rs2535627	C	T	0.0227	0.0099	0.02129
FinnGen	rs832187	T	C	-0.0088	0.0102	0.386
FinnGen	rs7432375	A	G	0.0088	0.0099	0.3746
FinnGen	rs9841616	A	T	-0.0011	0.0156	0.9442
FinnGen	rs215411	A	T	-0.0072	0.0103	0.4846
FinnGen	rs35518360	T	A	-0.0621	0.0343	0.07009
FinnGen	rs10520163	C	T	-0.0055	0.0102	0.5888
FinnGen	rs1106568	A	G	0.0079	0.0115	0.4924
FinnGen	rs1501357	C	T	-0.0034	0.0128	0.7895
FinnGen	rs4391122	G	A	0.0068	0.0099	0.4901
FinnGen	rs16867576	G	A	-0.0235	0.0157	0.1342
FinnGen	rs4388249	T	C	-0.0149	0.0113	0.1867
FinnGen	rs10043984	T	C	-0.0013	0.0107	0.9017
FinnGen	rs3849046	T	C	-0.0289	0.0101	0.004013
FinnGen	rs79212538	T	G	-0.0248	0.0202	0.2213
FinnGen	rs111294930	G	A	0.0058	0.0112	0.6025
FinnGen	rs2973155	C	T	-0.0059	0.0101	0.5583
FinnGen	rs12522290	G	C	-0.0213	0.0138	0.1225
FinnGen	rs11740474	T	A	-0.016	0.01	0.1099
FinnGen	rs1339227	T	C	-0.0041	0.0099	0.6784
FinnGen	rs117074560	T	C	0.0279	0.0229	0.2227
FinnGen	rs12704290	A	G	-0.0135	0.0152	0.3752
FinnGen	rs6466055	C	A	-0.0039	0.0106	0.7144
FinnGen	rs211829	C	T	0.0119	0.0098	0.2249
FinnGen	rs13240464	C	T	0.0029	0.0103	0.7774
FinnGen	rs7801375	G	A	-0.0178	0.0135	0.1858
FinnGen	rs3735025	C	T	0.0223	0.0103	0.03101
FinnGen	rs10503253	A	C	0.0133	0.0108	0.2208
FinnGen	rs73229090	A	C	-0.0374	0.0167	0.02549
FinnGen	rs6984242	A	G	-0.0118	0.0099	0.2331
FinnGen	rs7819570	T	G	0.0059	0.0135	0.6645
FinnGen	rs36068923	G	A	0.0034	0.0137	0.8056
FinnGen	rs4129585	C	A	-0.0066	0.01	0.512
FinnGen	rs11139497	A	T	-0.0153	0.0115	0.1837
FinnGen	rs7893279	G	T	0.0261	0.0142	0.06629
FinnGen	rs11191419	A	T	-0.0055	0.0105	0.5968
FinnGen	rs55833108	T	G	0.007	0.0118	0.5495
FinnGen	rs11027857	A	G	0.0157	0.0101	0.1196
FinnGen	rs9420	G	A	0.0097	0.0102	0.3396
FinnGen	rs12421382	T	C	0.0077	0.0099	0.4369
FinnGen	rs2514218	T	C	-0.0284	0.0123	0.02097
FinnGen	rs77502336	C	G	0.0027	0.0106	0.8022
FinnGen	rs55661361	A	G	-0.0039	0.0104	0.7117
FinnGen	rs10791097	G	T	0.0051	0.0098	0.6029
FinnGen	rs75059851	G	A	-0.0213	0.011	0.05197
FinnGen	rs2007044	G	A	0.0145	0.0103	0.1591
FinnGen	rs2239063	C	A	-0.0018	0.0107	0.8637
FinnGen	rs679087	A	C	0.0031	0.0104	0.7651
FinnGen	rs324017	C	A	0.0159	0.0105	0.13
FinnGen	rs12826178	T	G	0.0229	0.0154	0.1373
FinnGen	rs4240748	G	C	0.0036	0.0105	0.7335
FinnGen	rs10860964	C	T	0.0005	0.0108	0.9598
FinnGen	rs4766428	T	C	0.0198	0.0099	0.04507
FinnGen	rs2851447	C	G	0.0243	0.0121	0.04393
FinnGen	rs2068012	C	T	-0.0057	0.0116	0.6265
FinnGen	rs2332700	G	C	0.0002	0.0111	0.9838
FinnGen	rs2693698	G	A	-0.0138	0.0099	0.1644
FinnGen	rs12887734	G	T	0.0171	0.0106	0.1083
FinnGen	rs56205728	A	G	0.0029	0.0116	0.8048
FinnGen	rs12903146	A	G	-0.0055	0.0098	0.577
FinnGen	rs12148337	C	T	-0.007	0.0099	0.4791
FinnGen	rs8042374	G	A	-0.0117	0.0108	0.2824
FinnGen	rs950169	T	C	0.0102	0.0111	0.3581
FinnGen	rs4702	A	G	0.0348	0.0099	0.0004271
FinnGen	rs9922678	A	G	0.0048	0.0109	0.6591
FinnGen	rs7405404	C	T	-0.001	0.0116	0.9327
FinnGen	rs12691307	G	A	0.0245	0.0098	0.01239
FinnGen	rs12325245	T	A	0.0075	0.0144	0.5999
FinnGen	rs8044995	A	G	0.0037	0.013	0.7761
FinnGen	rs4523957	T	G	-0.0142	0.0101	0.1595
FinnGen	rs8082590	A	G	-0.0221	0.0101	0.02941
FinnGen	rs78322266	T	G	0.0444	0.0311	0.1536
FinnGen	rs9636107	G	A	0.0109	0.0099	0.2696
FinnGen	rs72934570	T	C	-0.0061	0.0216	0.7796
FinnGen	rs715170	T	C	0.0008	0.0103	0.9395
FinnGen	rs2905426	T	G	0.0033	0.0109	0.7616
FinnGen	rs2053079	G	A	-0.0179	0.0113	0.1117
FinnGen	rs56873913	G	T	-0.0174	0.012	0.1447
FinnGen	rs6065094	G	A	-0.0041	0.0103	0.6889
FinnGen	rs7267348	C	T	-0.0086	0.0119	0.471
FinnGen	rs1023500	C	T	0.0119	0.0124	0.3395
FinnGen	rs6002655	T	C	0.0096	0.0101	0.3389
FinnGen	rs12845396	T	A	-0.0011	0.0098	0.9115
FinnGen	rs1378559	C	T	-0.0001	0.0117	0.9929

## Sheet: UK Biobank ICD 10
Phenotype	SNP	effect_allele	other_allele	beta	se	pval
ICD 10	rs4648845	T	C	0.00935356	0.00645905	0.15
ICD 10	rs1498232	C	T	-0.00438508	0.00697808	0.53
ICD 10	rs11210892	A	G	0.0049143	0.00684499	0.47
ICD 10	rs12129573	A	C	0.00283425	0.00673294	0.67
ICD 10	rs76869799	G	C	-0.00333554	0.0183156	0.86
ICD 10	rs1702294	C	T	-0.0153551	0.0082144	0.0619998
ICD 10	rs140505938	T	C	-0.00116174	0.00862647	0.89
ICD 10	rs6670165	T	C	0.00472048	0.00820762	0.57
ICD 10	rs7523273	G	A	-0.00232978	0.006841	0.73
ICD 10	rs10803138	G	A	-0.0172345	0.00742965	0.02
ICD 10	rs77149735	A	G	0.0152037	0.0206433	0.46
ICD 10	rs14403	T	C	0.00118861	0.00775481	0.88
ICD 10	rs11682175	C	T	-0.0131427	0.00644942	0.0420001
ICD 10	rs75575209	A	T	-0.00529019	0.0111581	0.64
ICD 10	rs3768644	A	G	0.00402161	0.0100324	0.69
ICD 10	rs2909457	A	G	0.01929	0.0064433	0.00280001
ICD 10	rs11693094	T	C	-0.00255509	0.00645039	0.69
ICD 10	rs59979824	A	C	0.00998038	0.00679585	0.14
ICD 10	rs6434928	A	G	-0.00273931	0.0068374	0.69
ICD 10	rs6704641	A	G	0.0201505	0.00826582	0.015
ICD 10	rs11685299	A	C	0.0076978	0.00688926	0.26
ICD 10	rs6704768	A	G	-0.00953328	0.00648837	0.14
ICD 10	rs17194490	T	G	-0.00269143	0.00868981	0.760001
ICD 10	rs4330281	C	T	-0.0105262	0.0064389	0.1
ICD 10	rs75968099	T	C	-0.0142513	0.00677202	0.0350002
ICD 10	rs2535627	C	T	0.0287358	0.00646108	8.70001e-06
ICD 10	rs832187	T	C	0.0175848	0.00667941	0.00850002
ICD 10	rs7432375	A	G	0.0170109	0.00655025	0.00940005
ICD 10	rs9841616	A	T	0.015168	0.00855112	0.0759994
ICD 10	rs215411	A	T	-0.00167637	0.00688342	0.81
ICD 10	rs35518360	T	A	-0.0330939	0.0119448	0.00560003
ICD 10	rs10520163	C	T	0.00506436	0.00645408	0.43
ICD 10	rs1106568	A	G	-0.0177701	0.00751479	0.0179999
ICD 10	rs1501357	C	T	0.00873483	0.00827894	0.29
ICD 10	rs4391122	G	A	0.00394303	0.00645625	0.54
ICD 10	rs16867576	G	A	-0.00761016	0.00940429	0.42
ICD 10	rs4388249	T	C	0.00570659	0.0087228	0.51
ICD 10	rs10043984	T	C	-0.0110494	0.00732619	0.13
ICD 10	rs3849046	T	C	0.000748744	0.00653436	0.91
ICD 10	rs79212538	T	G	0.0119506	0.0155194	0.44
ICD 10	rs111294930	G	A	0.00299433	0.0070979	0.67
ICD 10	rs2973155	T	C	0.00450102	0.00673542	0.5
ICD 10	rs12522290	G	C	-0.00752998	0.00838092	0.37
ICD 10	rs11740474	T	A	0.00149045	0.00655297	0.82
ICD 10	rs1339227	C	T	0.00190491	0.00681765	0.780001
ICD 10	rs117074560	T	C	0.00433795	0.0146767	0.77
ICD 10	rs12704290	A	G	0.00481219	0.0100568	0.630001
ICD 10	rs6466055	C	A	-0.0200784	0.00672488	0.00280001
ICD 10	rs211829	C	T	-0.00969781	0.00661529	0.14
ICD 10	rs13240464	C	T	0.00611269	0.00681595	0.37
ICD 10	rs7801375	G	A	-0.0248106	0.00876305	0.00460002
ICD 10	rs3735025	C	T	0.00877525	0.00672652	0.19
ICD 10	rs10503253	A	C	0.00186553	0.00818203	0.82
ICD 10	rs73229090	A	C	-0.00674232	0.0100975	0.5
ICD 10	rs6984242	A	G	0.0173314	0.00655785	0.00819993
ICD 10	rs7819570	T	G	0.00314472	0.00854535	0.709999
ICD 10	rs36068923	G	A	-0.00697355	0.00795069	0.38
ICD 10	rs4129585	C	A	-0.0165678	0.00647003	0.01
ICD 10	rs11139497	A	T	0.0122395	0.00684689	0.0739997
ICD 10	rs7893279	G	T	0.0168123	0.0101255	0.0969996
ICD 10	rs11191419	A	T	-0.0103174	0.00683427	0.13
ICD 10	rs55833108	T	G	0.00235463	0.00776529	0.760001
ICD 10	rs11027857	A	G	0.00683167	0.00642151	0.29
ICD 10	rs9420	G	A	-0.00820672	0.00687189	0.23
ICD 10	rs12421382	T	C	0.0120638	0.00687921	0.0790005
ICD 10	rs2514218	T	C	-0.0160048	0.00673318	0.017
ICD 10	rs77502336	C	G	-0.00184193	0.00686001	0.79
ICD 10	rs55661361	A	G	0.00478571	0.00688175	0.49
ICD 10	rs10791097	G	T	0.0177189	0.00644851	0.00599998
ICD 10	rs75059851	G	A	-0.00585152	0.00818175	0.47
ICD 10	rs2007044	G	A	0.0111024	0.00658779	0.0920005
ICD 10	rs2239063	C	A	0.0162738	0.00712334	0.0219999
ICD 10	rs679087	A	C	-0.00167538	0.00671796	0.8
ICD 10	rs324017	C	A	0.00306216	0.00706018	0.66
ICD 10	rs12826178	T	G	-0.00560695	0.0124134	0.649999
ICD 10	rs4240748	G	C	0.00370124	0.00666781	0.58
ICD 10	rs10860964	C	T	-0.0035983	0.00662049	0.59
ICD 10	rs4766428	T	C	0.000967831	0.00651844	0.88
ICD 10	rs2851447	C	G	0.0117267	0.00746098	0.12
ICD 10	rs2068012	C	T	-0.000791863	0.00766606	0.92
ICD 10	rs2332700	G	C	0.017727	0.00745277	0.017
ICD 10	rs2693698	G	A	0.00727577	0.00648686	0.26
ICD 10	rs12887734	T	G	0.0284343	0.0071088	6.29999e-05
ICD 10	rs56205728	A	G	0.00634535	0.00728398	0.38
ICD 10	rs12903146	A	G	0.00722107	0.00645937	0.26
ICD 10	rs12148337	C	T	-0.0011116	0.00643655	0.86
ICD 10	rs8042374	G	A	-0.0161649	0.00764474	0.0340001
ICD 10	rs950169	T	C	0.00613862	0.00725845	0.4
ICD 10	rs4702	A	G	0.032395	0.00646513	5.39995e-07
ICD 10	rs9922678	A	G	-0.00428948	0.00710076	0.55
ICD 10	rs7405404	C	T	-0.000210256	0.00769539	0.98
ICD 10	rs12691307	G	A	0.0164433	0.00646591	0.0109999
ICD 10	rs12325245	T	A	0.0134599	0.0090492	0.14
ICD 10	rs8044995	A	G	-0.00210405	0.00872368	0.81
ICD 10	rs4523957	T	G	-0.0205108	0.00672159	0.00230001
ICD 10	rs8082590	A	G	-0.0150731	0.00696276	0.0299999
ICD 10	rs78322266	T	G	0.0162968	0.01973	0.41
ICD 10	rs9636107	G	A	-0.00528626	0.00645317	0.41
ICD 10	rs72934570	T	C	0.0188243	0.0116697	0.11
ICD 10	rs715170	T	C	0.0105174	0.00725466	0.15
ICD 10	rs2905426	T	G	0.0035487	0.00674098	0.6
ICD 10	rs2053079	G	A	-0.0153811	0.00747257	0.04
ICD 10	rs56873913	G	T	0.00591092	0.00764553	0.44
ICD 10	rs6065094	G	A	-0.0099717	0.00686236	0.15
ICD 10	rs7267348	C	T	0.0145617	0.00747105	0.051
ICD 10	rs9607782	A	T	0.0116975	0.00740389	0.11
ICD 10	rs1023500	C	T	0.000776564	0.00805284	0.92
ICD 10	rs6002655	T	C	0.00460816	0.00655052	0.48

## Sheet: UK Bioabnk Self-reported 
Phenotype	SNP	effect_allele	other_allele	新beta	新se	pval
Self-reported	rs4648845	T	C	0.00231052	0.00387619	0.55
Self-reported	rs1498232	C	T	0.00738729	0.00418765	0.0779992
Self-reported	rs11210892	A	G	0.00642858	0.00410767	0.12
Self-reported	rs12129573	A	C	0.00309507	0.0040406	0.44
Self-reported	rs76869799	G	C	0.0185636	0.0109913	0.0909997
Self-reported	rs1702294	C	T	-0.00931394	0.00492946	0.0589997
Self-reported	rs140505938	T	C	-0.0065643	0.00517681	0.2
Self-reported	rs6670165	T	C	0.00436118	0.00492546	0.38
Self-reported	rs7523273	G	A	-0.00832526	0.00410531	0.0430002
Self-reported	rs10803138	G	A	-0.0110448	0.00445858	0.0129999
Self-reported	rs77149735	A	G	-0.00808045	0.0123883	0.51
Self-reported	rs14403	T	C	0.00315203	0.00465372	0.5
Self-reported	rs11682175	C	T	-0.0143891	0.00387001	0.0002
Self-reported	rs75575209	A	T	-0.00375789	0.00669524	0.57
Self-reported	rs3768644	A	G	0.00720134	0.00602014	0.23
Self-reported	rs2909457	A	G	0.00924127	0.00386642	0.017
Self-reported	rs11693094	T	C	-0.00907519	0.00387063	0.0189998
Self-reported	rs59979824	A	C	0.0126999	0.00407786	0.00179999
Self-reported	rs6434928	A	G	0.00147213	0.00410282	0.719999
Self-reported	rs6704641	A	G	0.00296458	0.00495999	0.55
Self-reported	rs11685299	A	C	0.0179174	0.00413395	1.5e-05
Self-reported	rs6704768	A	G	-0.00467536	0.00389341	0.23
Self-reported	rs17194490	T	G	-0.00839102	0.00521676	0.11
Self-reported	rs4330281	C	T	-0.00700215	0.00386544	0.0700003
Self-reported	rs75968099	T	C	-0.00168887	0.0040654	0.68
Self-reported	rs2535627	C	T	0.00973038	0.00387868	0.012
Self-reported	rs832187	T	C	-0.00328624	0.00400984	0.41
Self-reported	rs7432375	A	G	0.0148008	0.00393231	0.00017
Self-reported	rs9841616	A	T	0.00563316	0.00513329	0.27
Self-reported	rs215411	A	T	0.00022932	0.00413228	0.96
Self-reported	rs35518360	T	A	-0.0495139	0.00717103	5.00035e-12
Self-reported	rs10520163	C	T	0.00405239	0.00387463	0.3
Self-reported	rs1106568	A	G	-0.00543448	0.00451147	0.23
Self-reported	rs1501357	C	T	0.000296774	0.00497018	0.95
Self-reported	rs4391122	G	A	0.000245092	0.00387585	0.95
Self-reported	rs16867576	G	A	-0.00225735	0.0056458	0.69
Self-reported	rs4388249	T	C	-0.00306744	0.00523671	0.56
Self-reported	rs10043984	T	C	-0.0068823	0.0043982	0.12
Self-reported	rs3849046	T	C	0.000842847	0.00392292	0.83
Self-reported	rs79212538	T	G	-0.00717791	0.00931708	0.44
Self-reported	rs111294930	G	A	0.00217311	0.00426121	0.61
Self-reported	rs2973155	T	C	-0.00265311	0.00404357	0.51
Self-reported	rs12522290	G	C	0.00533437	0.00503146	0.29
Self-reported	rs11740474	T	A	-0.00528354	0.00393406	0.18
Self-reported	rs1339227	C	T	0.00446554	0.00409264	0.28
Self-reported	rs117074560	T	C	0.00490426	0.00881016	0.58
Self-reported	rs12704290	A	G	-0.000674276	0.00603777	0.91
Self-reported	rs6466055	C	A	-0.00914064	0.00403747	0.0239999
Self-reported	rs211829	C	T	-0.00452764	0.00397166	0.25
Self-reported	rs13240464	C	T	-0.00103713	0.00409216	0.8
Self-reported	rs7801375	G	A	-0.0138907	0.00526127	0.00830004
Self-reported	rs3735025	C	T	0.0065787	0.00403848	0.1
Self-reported	rs10503253	A	C	0.00619181	0.00491325	0.21
Self-reported	rs73229090	A	C	0.000462569	0.00606362	0.94
Self-reported	rs6984242	A	G	0.00402912	0.00393796	0.31
Self-reported	rs7819570	T	G	-0.00573176	0.00513144	0.26
Self-reported	rs36068923	G	A	-0.00566945	0.00477443	0.24
Self-reported	rs4129585	C	A	-0.0200266	0.00388526	2.5e-07
Self-reported	rs11139497	A	T	-0.00146595	0.00411221	0.719999
Self-reported	rs7893279	G	T	0.0227599	0.00607893	0.000179999
Self-reported	rs11191419	A	T	-0.00876807	0.00410309	0.0329997
Self-reported	rs55833108	T	G	-0.000112659	0.00466211	0.98
Self-reported	rs11027857	A	G	0.00304997	0.00385607	0.43
Self-reported	rs9420	G	A	0.00387296	0.00412636	0.35
Self-reported	rs12421382	T	C	0.00630276	0.00413081	0.13
Self-reported	rs2514218	T	C	-0.0138379	0.00404315	0.000619998
Self-reported	rs77502336	C	G	-0.000130637	0.00411936	0.97
Self-reported	rs55661361	A	G	0.0016748	0.00413239	0.69
Self-reported	rs10791097	G	T	0.00816972	0.00387221	0.0350002
Self-reported	rs75059851	G	A	-0.0135615	0.00491295	0.00580003
Self-reported	rs2007044	G	A	0.00588442	0.00395456	0.14
Self-reported	rs2239063	C	A	0.0108431	0.0042762	0.0109999
Self-reported	rs679087	A	C	-0.00100634	0.00403277	0.8
Self-reported	rs324017	C	A	0.00127955	0.00423825	0.760001
Self-reported	rs12826178	T	G	0.0043607	0.00745175	0.56
Self-reported	rs4240748	G	C	0.000287362	0.00400269	0.94
Self-reported	rs10860964	C	T	-0.00116052	0.00397439	0.77
Self-reported	rs4766428	T	C	0.00281699	0.00391305	0.47
Self-reported	rs2851447	C	G	0.00638356	0.00447883	0.15
Self-reported	rs2068012	C	T	0.00689301	0.00460629	0.13
Self-reported	rs2332700	G	C	0.0034263	0.0044781	0.44
Self-reported	rs2693698	G	A	0.00679927	0.00389767	0.0810009
Self-reported	rs12887734	T	G	0.0170892	0.00427143	6.29999e-05
Self-reported	rs56205728	A	G	0.00158895	0.0043758	0.719999
Self-reported	rs12903146	A	G	0.0036207	0.0038804	0.35
Self-reported	rs12148337	C	T	-0.00184801	0.00386672	0.630001
Self-reported	rs8042374	G	A	-0.00233556	0.00459245	0.61
Self-reported	rs950169	T	C	-0.000326801	0.00436045	0.94
Self-reported	rs4702	A	G	0.0302788	0.00388383	6.4003e-15
Self-reported	rs9922678	A	G	-0.00162218	0.00426536	0.7
Self-reported	rs7405404	C	T	-0.00223399	0.00462246	0.630001
Self-reported	rs12691307	G	A	0.00814775	0.00388393	0.0359998
Self-reported	rs12325245	T	A	0.0132884	0.0054356	0.0140001
Self-reported	rs8044995	A	G	-0.00225405	0.00524033	0.67
Self-reported	rs4523957	T	G	-0.012198	0.00403706	0.0025
Self-reported	rs8082590	A	G	-0.0111762	0.00418195	0.00749998
Self-reported	rs78322266	T	G	0.021502	0.0118545	0.0700003
Self-reported	rs9636107	G	A	-0.00617121	0.00387712	0.11
Self-reported	rs72934570	T	C	0.00892769	0.00701131	0.2
Self-reported	rs715170	T	C	0.00887712	0.00435868	0.0420001
Self-reported	rs2905426	T	G	0.000140382	0.00404939	0.97
Self-reported	rs2053079	G	A	-0.0136128	0.0044889	0.00239999
Self-reported	rs56873913	G	T	0.00145436	0.00459275	0.75
Self-reported	rs6065094	G	A	-0.00868223	0.00412259	0.0350002
Self-reported	rs7267348	C	T	0.000778777	0.00448829	0.86
Self-reported	rs9607782	A	T	0.00830746	0.00444976	0.0619998
Self-reported	rs1023500	C	T	-0.00712106	0.00483976	0.14
Self-reported	rs6002655	T	C	0.00797823	0.00393687	0.0430002
