# Supplementary material for: Genetic liability to mental disorders in relation to the risk of hypertension
Source: Front Cardiovasc Med. 2023 Feb 27;10:1087251. doi: 10.3389/fcvm.2023.1087251 (PMC10008891; doi:10.3389/fcvm.2023.1087251)
Supplement: Supplementary file 9 [file Table_9.XLSX]

## Sheet: Subjective well-being
Phenotype	SNP	effect_allele	other_allele	beta	se	pval
Subjective well-being	rs3756290	A	G	-0.0177	0.0031	9.55e-09
Subjective well-being	rs2075677	A	G	0.0175	0.0031	1.49e-08
Subjective well-being	rs4958581	T	C	0.0153	0.0027	2.29e-08

## Sheet: FinnGen
Phenotype	SNP	effect_allele	other_allele	beta	se	pval
FinnGen	rs3756290	G	A	0.0036	0.0103	0.7231
FinnGen	rs2075677	G	A	0.0098	0.0118	0.4033
FinnGen	rs4958581	C	T	-0.0046	0.0104	0.6562

## Sheet: UK Biobank ICD 10
Phenotype	SNP	effect_allele	other_allele	beta	se	pval
ICD 10	rs3756290	G	A	-0.00972049	0.00762782	0.2
ICD 10	rs2075677	G	A	-0.0240828	0.00745152	0.0012
ICD 10	rs4958581	C	T	-0.00192306	0.00677673	0.780001

## Sheet: UK Bioabnk Self-reported 
Phenotype	SNP	effect_allele	other_allele	beta	se	pval
Self-reported	rs3756290	G	A	-0.00150869	0.00457924	0.74
Self-reported	rs2075677	G	A	-0.0172184	0.00447655	0.00012
Self-reported	rs4958581	C	T	-0.00804609	0.00406831	0.0479999
